1 **DNA methylation epigenetically regulates gene expression in**

2 ***Burkholderia cenocepacia***

3

4 Ian Vandebussche<sup>a</sup>, Andrea Sass<sup>a</sup>, Marta Pinto-Carbó<sup>b</sup>, Olga Mannweiler<sup>b</sup>, Leo Eberl<sup>b</sup>,

5 Tom Coenye<sup>a</sup>#

6

7 <sup>a</sup> Laboratory of Pharmaceutical Microbiology, Ghent University, Ghent, Belgium

8 <sup>b</sup> Department of Plant and Microbial Microbiology, University of Zurich, Zurich,

9 Switzerland

10

11 Running Head: Methylases regulate gene expression in *B. cenocepacia*

12

13 #Address correspondence to Tom Coenye, tom.coenye@UGent.be

14

15 Word Count Abstract: 232

16 Word Count Text: 4997

17

18

19

20

21

22

## 23 **Abstract**

24 Respiratory tract infections by the opportunistic pathogen *Burkholderia cenocepacia*  
25 often lead to severe lung damage in cystic fibrosis (CF) patients. New insights in how to  
26 tackle these infections might emerge from the field of epigenetics, as DNA methylation  
27 has shown to be an important regulator of gene expression. The present study focused  
28 on two DNA methyltransferases (MTases) in *B. cenocepacia* strains J2315 and K56-2,  
29 and their role in regulating gene expression. *In silico* predicted DNA MTase genes  
30 BCAL3494 and BCAM0992 were deleted in both strains, and the phenotypes of the  
31 resulting deletion mutants were studied: deletion mutant  $\Delta$ BCAL3494 showed changes  
32 in biofilm structure and cell aggregation,  $\Delta$ BCAM0992 was less motile. *B. cenocepacia*  
33 wild type cultures treated with sinefungin, a known DNA MTase inhibitor, exhibited the  
34 same phenotype as DNA MTase deletion mutants. Single-Molecule Real-Time  
35 sequencing was used to characterize the methylome of *B. cenocepacia*, including  
36 methylation at the origin of replication, and motifs CACAG and GTWWAC were  
37 identified as targets of BCAL3494 and BCAM0992, respectively. All genes with  
38 methylated motifs in their putative promoter region were identified and qPCR  
39 experiments showed an upregulation of several genes, including biofilm and motility  
40 related genes, in MTase deletion mutants with unmethylated motifs, explaining the  
41 observed phenotypes in these mutants. In summary, our data confirm that DNA  
42 methylation plays an important role in regulating the expression of *B. cenocepacia*  
43 genes involved in biofilm formation and motility.

44

## 45 **Importance**

46 CF patients diagnosed with *B. cenocepacia* infections often experience rapid  
47 deterioration of lung function, known as *cepacia syndrome*. *B. cenocepacia* has a large  
48 multi-replicon genome and a lot remains to be learned about regulation of gene  
49 expression in this organism. From studies in other (model) organisms, it is known that  
50 epigenetic changes through DNA methylation play an important role in this regulation.  
51 The identification of *B. cenocepacia* genes of which the expression is regulated by DNA  
52 methylation and identification of the regulatory systems involved in this methylation are  
53 likely to lead to new insights in how to tackle *B. cenocepacia* infections in CF patients.

54

## 55 **Introduction**

56 *Burkholderia cenocepacia*, a member of the *Burkholderia cepacia* complex (Bcc),  
57 is an aerobic Gram-negative bacterium that can be isolated from soil and water (1–3).  
58 *B. cenocepacia* is also known as an opportunistic pathogen in immunocompromised  
59 patients (4–6). Infection of the upper airways in cystic fibrosis (CF) patients often leads  
60 to severe illness, typically referred to as *cepacia syndrome* (1,7). CF patients diagnosed  
61 with *cepacia syndrome* experience a progressive decrease in lung function, often  
62 accompanied by bacteremia and sepsis. If left untreated, *cepacia syndrome* can lead to  
63 death within weeks (8,9). The genome of *B. cenocepacia* is complex (with usually three  
64 large replicons), with a high GC-content (67%) and large size, comprising approximately  
65 8.06 Mb (10). The species has been classified into different phylogenetic clusters and  
66 subdivided into lineages, including the highly transmissible ET-12 lineage that harbors  
67 *B. cenocepacia* strains J2315 and K56-2 (11,12).

68           Epigenetics is the study of heritable changes in gene expression without changes  
69 in the actual genomic sequence. In bacterial genomes, epigenetic control is exerted by  
70 DNA methyltransferase enzymes (MTases) (13–15). DNA MTases originate from  
71 restriction-modification (RM) systems, early defense mechanisms in bacteria with an  
72 active interplay between endonucleases and DNA MTases, which cleave foreign DNA  
73 but protect the own genome. In addition, discovery of orphan DNA MTases, enzymes  
74 without a cognate endonuclease, shows that DNA MTases are not exclusively  
75 dependent on the presence of the restriction part to function as regulator of gene  
76 expression (16).

77           DNA MTases interact with specific DNA recognition sites and transfer a CH<sub>3</sub>-  
78 group from a methyl donor, mostly S-adenosyl methionine, to a cytosine (C<sub>5</sub>-methyl  
79 cytosine or N<sub>4</sub>-methyl cytosine) or adenine (N<sub>6</sub>-methyl adenine) base (17,18). As  
80 methylated bases change the binding affinity of DNA binding proteins, methylation at  
81 regulatory regions allows bacteria to regulate gene expression at the level of  
82 transcription (19,20). While both cytosine and adenine methylation occur in eukaryotic  
83 and prokaryotic cells, C<sub>5</sub>-methyl cytosine is the archetypal eukaryotic base methylation  
84 signature (16,21). Conversely, in prokaryotes, N<sub>6</sub>-methyl adenine is the most important  
85 base modification involved in gene expression regulation (22). In addition to this, studies  
86 with DNA MTases *Dam* (deoxyadenosine methyltransferase) and *Dcm* (DNA cytosine  
87 MTase) in *Escherichia coli* have demonstrated that, besides having a regulatory  
88 function, DNA MTases also take part in crucial cellular processes like DNA replication  
89 initiation or methyl-directed mismatch repair (21,23).

90           Detection of (genome-wide) DNA methylation patterns has been challenging in  
91 the past. The use of specific restriction enzymes with affinity for methylated sites,  
92 followed by a comparison of the resulting fragment lengths gave a good impression of  
93 methylation of the treated DNA at one particular area, but global methylation analysis  
94 was until recently difficult at best (21,24). The rise of Next-Generation Sequencing and  
95 Single-Molecule Real-Time (SMRT) technologies tremendously improved quality of  
96 methylome analyses, but it also made it much more accessible (25,26). SMRT  
97 Sequencing uses a sequencing-by-synthesis approach with fluorescently labeled  
98 nucleotides. Pulse width, the signal of nucleotide incorporation, and interpulse duration,  
99 the time between two incorporations, allow to discriminate between incorporated bases  
100 and their methylation status (27).

101           The purpose of the present study is to understand how DNA methylation  
102 regulates gene expression in *B. cenocepacia*. To this end, a genome-wide methylome  
103 analysis was carried out, and genes under DNA methylation regulation were identified.  
104 Interpretation of the working mechanisms of these regulatory systems, might lead to  
105 new insights in how to tackle *B. cenocepacia* infections in CF patients.

106

## 107 **Results**

### 108 **Identification of *B. cenocepacia* DNA MTases**

109           All predicted DNA MTase genes in the *B. cenocepacia* J2315 genome were  
110 identified using REBASE (Table S1). DNA MTase genes BCAL3494 and BCAM0992,  
111 widely distributed within the genus *Burkholderia*, were selected for further analysis.  
112 Gene BCAL3494, located on the first replicon of *B. cenocepacia*, is a type III

113 methyltransferase that is part of a RM-system, together with a restriction enzyme  
114 encoded by the neighbouring gene BCAL3493. Gene BCAM0992 is located on the  
115 second replicon and apparently does not have any adjacent genes coding for restriction  
116 enzymes. The gene is classified as coding for a type II methyltransferase, i.e. the  
117 restriction and modification enzymes act separately and are not dependent on each  
118 other (28). To investigate the influence of BCAL3494 and BCAM0992 on bacterial  
119 physiology, deletion mutants were constructed (Figure S1). For the other DNA MTase  
120 genes in *B. cenocepacia* J2315 identified with REBASE (Table S1), homologues in  
121 different *Burkholderia* strains could not be found; these genes were not further  
122 investigated in the present study.

### 123 **Phenotype of mutant strains**

124 BCAL3494 and BCAM0992 were deleted in two *B. cenocepacia* strains, J2315  
125 and K56-2, and the phenotype of the deletion mutants was investigated in detail. No  
126 differences in growth between wild type and mutant strains were observed when  
127 cultured in phosphate buffered mineral medium (Figure S2). Microscopic analysis  
128 clearly showed a different, more clustered biofilm morphology for both BCAL3494  
129 deletion mutants ( $\Delta$ BCAL3494) compared to wild type strains, whereas the biofilm  
130 structure of the BCAM0992 deletion mutants ( $\Delta$ BCAM0992) did not differ from wild type  
131 (Figure 1A). Cell aggregation in planktonic cultures was investigated using flow  
132 cytometry (Figure 1B). The degree of aggregation in the BCAL3494 mutant strains was  
133 significantly higher (p-value J2315: 0.049, p-value K56-2: 0.001) than in the  
134 corresponding wild type strains. Also, the ability to form a pellicle, a biofilm-like structure  
135 at the air-liquid interface, was investigated (Figure 1C). Pellicle formation was clearly

136 increased for both  $\Delta$ BCAL3494 mutants compared to wild type strains and to  
137  $\Delta$ BCAM0992 mutants. Complemented mutant strains  $c\Delta$ BCAL3494 and  $c\Delta$ BCAM0992  
138 did not differ significantly from wild type in these experiments (Figure S3).

139 Motility of all strains was assessed using a swimming motility assay on 0.3 %  
140 agar plates. After 24h (strain K56-2), and 32h (strain J2315), plates were photographed  
141 and diameters measured (Figure 2). Diameters were significantly smaller for both  
142  $\Delta$ BCAM0992 mutants compared to wild type (p-value J2315: 0.002, p-value K56-2 <  
143 0.001). Both  $\Delta$ BCAL3494 mutants, as well as the complemented mutants, were  
144 identical to wild type in this regard. We also investigated swarming motility, but no  
145 significant differences between the different strains were observed (Figure S4).

#### 146 **Effect of the DNA MTase inhibitor sinefungin on methylation-dependent** 147 **phenotypes**

148 Sinefungin, a structural analog of S-adenosyl methionine and known for blocking  
149 base methylation in other bacteria such as *Streptococcus pneumoniae* (29), was used  
150 as DNA MTase inhibitor. The minimum inhibitory concentration (MIC) of sinefungin in  
151 *B. cenocepacia* J2315 and K56-2 was determined and was found to be higher than 200  
152  $\mu$ g/mL. Both strains were exposed to sinefungin concentrations below the MIC of  
153 sinefungin (50  $\mu$ g/mL) to assure any effect observed was not due to growth inhibition by  
154 sinefungin, and the effect on biofilm formation, pellicle formation, cell aggregation and  
155 motility was quantified (Figure 3). Bacteria exposed to sinefungin produced more pellicle  
156 mass, showed a higher degree of cell aggregation (p-value: 0.003), had a different  
157 biofilm morphology, and were less motile (p-value: 0.004). These findings indicate that

158 chemically blocking DNA methylation or deleting genes responsible for DNA methylation  
159 lead to the same phenotypes in *B. cenocepacia* J2315 and K56-2.

## 160 **Methylome analysis**

161 Using SMRT sequencing (PacBio), the complete methylome of *B. cenocepacia*  
162 J2315 and K56-2 was identified. Only data for strain J2315 are reported in the following  
163 section, as data for strain K56-2 were highly comparable (Figures 4 and 5). Three  
164 distinct methylated motifs were identified in the wild type strain: CACAG, GTWWAC,  
165 and GCGGCCGC. The CACAG motif was methylated at the fourth position on the  
166 forward strand, whereas the GTWWAC motif was methylated at the fifth position on  
167 both the forward and reverse strand. Cytosine methylation of the GCGGCCGC motif  
168 occurred at the fifth position on both the forward and reverse strand. Although all  
169 CACAG and GTWWAC motifs were methylated in the wild type strains, methylation of  
170 the CACAG motif was absent in the  $\Delta$ BCAL3494 deletion mutants, and likewise, no  
171 methylation of the GTWWAC motif was seen in the  $\Delta$ BCAM0992 mutants (Table S2).  
172 This demonstrates that MTase BCAL3494 recognizes the CACAG motif, while MTase  
173 BCAM0992 recognizes the GTWWAC motif. In contrast, cytosine methylation of the  
174 GCGGCCGC motif was observed in wild type and in mutant strains, but the extent of  
175 methylation at this motif was highly variable in the four datasets. This suggests that this  
176 cytosine methylation occurs randomly, and that the GCGGCCGC motif might present a  
177 false positive result of motif analysis due to the high occurrence of short repeats of G  
178 and C in the GC-rich *B. cenocepacia* genome. In addition, almost no methylated  
179 GCGGCCGC motifs were found in regulatory regions, hinting at only a minor role for



180 cytosine methylation in regulation of gene expression. Therefore, cytosine methylation  
181 in *B. cenocepacia* was not further studied.

182 The location of every methylated CACAG and GTWWAC motif was mapped  
183 (Figures 4 and 5). A total of 6834 methylated CACAG motifs and 961 methylated  
184 GTWWAC motifs was found, of which the majority was present on the first replicon  
185 (CACAG: 45.6 %, GTWWAC: 49.9 %), followed by the second replicon (CACAG: 42.1  
186 %, GTWWAC: 38.9 %), the third replicon (CACAG: 10.6 %, GTWWAC: 9.0 %), and the  
187 plasmid (CACAG: 1.7 %, GTWWAC: 2.2 %). Subsequently, all genes with methylated  
188 motifs in their promoter region, here defined as 60 bases upstream of the transcription  
189 start site, were identified. 91 promoter regions contained methylated CACAG motifs,  
190 and 80 promoter regions contained methylated GTWWAC motifs, with most of the  
191 motifs being present on the first replicon (Figures 4 and 5). Functional classes of genes  
192 found in the dataset of genes with methylated promoter include genes involved in  
193 intermediary metabolism, regulation, and transport (Tables S3 and S4).

194 Virtual Footprint was used to elucidate to which transcription factor (TF) binding  
195 sites the discovered methylation motifs CACAG and GTWWAC showed any similarity.  
196 Data output of the analysis is listed in Table S5. Sequences that contain methylation  
197 motif CACAG were similar to the binding site of *E. coli* K12 GlpR, while GTWWAC-  
198 containing sequences were similar to binding sites of several other *E. coli* K12 TFs,  
199 including ArcA, OxyR, Fis and Fur.

## 200 **Expression of genes with a methylated promoter**

201 The expression level of genes with methylated promoter regions was determined  
202 in wild type and mutant strains, using qPCR. Expression data of genes with methylated

203 promoter regions are listed in Tables 1 and 2. Volcano plots (Figure S5, fold changes  
204 plotted against corresponding p-values) show that most genes tested were upregulated  
205 in the mutants compared to the wild type strains. Six of these genes were significantly  
206 upregulated in mutants of both strain backgrounds: BCAL1515, BCAL2465, and  
207 BCAM0820 were upregulated in  $\Delta$ BCAL3494, whereas genes BCAL0079, BCAL2415,  
208 and BCAM1362 were upregulated in  $\Delta$ BCAM0992. Four additional genes were  
209 upregulated in K56-2 mutants only: BCAL0423, BCAM2738, and BCAS0223 were  
210 upregulated in  $\Delta$ BCAL3494, BCAL1556 in  $\Delta$ BCAM0992. Subsequently, the methylated  
211 promoter regions of these genes were analyzed in detail (Figure 6). In most cases, the  
212 methylated motif was in close proximity of the -10 or -30/35 element in bacterial  
213 promoter regions.

214 To confirm that the presence of methylation close to the -10 or -30/35 element  
215 influences transcription and therefore gene expression in *B. cenocepacia*, translational  
216 eGFP reporter fusions were constructed and eGFP production was quantified. The  
217 eGFP production in strains harboring different plasmids is shown in Figure 7. As  
218 expected, the production of eGFP, driven by the promoters of genes BCAL1515,  
219 BCAM0820, and BCAL0079, was significantly ( $p = 0.001$ ,  $p = 0.014$ ,  $p = 0.002$ ,  
220 respectively) increased in the deletion mutant for which an upregulation of these genes  
221 was observed using qPCR experiments (Figure 7).

## 222 **DNA methylation in the origin of replication**

223 DNA methylation was detected in all origins of replication of *B. cenocepacia*  
224 (Figure 8). Similar methylation patterns were observed in the origins of the different  
225 replicons. A previously discovered 7-mer (CTGTGCA) that can be found in all

226 replication origins (30), contains a CACAG methylation motif on the antisense strand.  
227 This motif was also found at the 3'-end of almost every DnaA box. These boxes are  
228 bound by DnaA proteins, essential for DNA unwinding and chromosome replication  
229 initiation (31). Also, the GTWWAC motif was found in proximity of the replication origins,  
230 consequently the origins in *B. cenocepacia* represent methylation-rich regions. Whereas  
231 methylated CACAG motifs were found throughout the origins of replication, the position  
232 of the GTWWAC methylation was unique in all replicons and at least two GTWWAC  
233 motifs were found in between two CACAG methylated DnaA boxes. In contrast to the  
234 origins of the three larger replicons, the origin of replication of the plasmid contained  
235 only one CACAG methylated DnaA box.

## 236 **Discussion**

237 Despite the growing knowledge of DNA methylation in prokaryotes (15), the role  
238 of DNA MTases in regulating gene expression in *B. cenocepacia* remains to be  
239 revealed. In the present study, we identified two DNA MTases (BCAL3494 and  
240 BCAM0992), and mutants in which these genes were deleted, showed differences in  
241 biofilm formation and motility. In addition, when methylation was blocked by the DNA  
242 MTase inhibitor sinefungin (32), the same phenotypic differences were observed. These  
243 findings demonstrate that epigenetic control of gene expression by MTases play an  
244 important role in controlling certain phenotypes. Similar results have been reported in  
245 *Salmonella enterica*, where DNA methylation is crucial for optimal pellicle and biofilm  
246 production (33).

247 Methylome analysis showed that mutants in which MTase  $\Delta$ BCAL3494 or  
248  $\Delta$ BCAM0992 were inactivated, lacked adenine methylation in specific motifs. MTase

249 BCAL3494 was specifically linked to methylation of the CACAG motif, MTase  
250 BCAM0992 to methylation of the GTWWAC motif. This strategy of DNA methylation  
251 analysis, in which the methylome of strains lacking MTases is determined, has been  
252 used in various bacteria, as it is an effective way to find associations between predicted  
253 MTases and genome-wide methylation motifs (34,35). For example, several methylation  
254 motifs were identified in *Burkholderia pseudomallei*, including motifs CACAG and  
255 GTWWAC (36). Two of the *B. pseudomallei* MTases (M.BpsI and M.BpsII) are  
256 homologous to the *B. cenocepacia* MTases BCAL3494 and BCAM0992. In *Ralstonia*  
257 *solanacearum*, an important plant pathogen that is phylogenetically related to *B.*  
258 *cenocepacia*, the GTWWAC methylation motif co-occurs with the respective homolog of  
259 the BCAM0992 MTase, whereas a BCAL3494 MTase homolog and methylation of  
260 CACAG are absent (37). As in *B. cenocepacia*, the BCAM0992 homolog in *R.*  
261 *solanacearum* is an orphan DNA MTase. Analysis of cytosine methylation suggests that  
262 cytosine is more likely to be methylated at random instead of at specific motifs, and is  
263 likely not having a major regulatory function. Also, GC-rich genomes complicate the  
264 search for specific cytosine motifs.

265 Previous epigenetic research demonstrated that there is a negative correlation  
266 between methylation in promoters and transcription (38). To uncover the role of DNA  
267 methylation in regulation of *B. cenocepacia* gene expression, all methylated motifs in  
268 promoter regions were identified. The data obtained in the present study indicates that  
269 gene expression was upregulated in DNA MTase mutants, suggesting that adenine  
270 DNA methylation in *B. cenocepacia* affects gene expression by a mechanism inhibiting  
271 transcription. In both prokaryotes and eukaryotes, adenine and cytosine methylation are

272 involved in blocking (or enhancing) the binding of RNA polymerase to DNA (15,21,39),  
273 and especially methylation near the -10 and -30/35 elements in the promoter region  
274 seems to be important for affecting RNA polymerase binding (40). We found that, also  
275 in *B. cenocepacia*, methylated motifs (CACAG and GTWWAC) are found close to, or in  
276 these elements.

277 BCAM0820, upregulated in the J2315 and K56-2  $\Delta$ BCAL3494 mutant, is a two-  
278 component response regulator, the first gene of an operon homologous to the Wsp  
279 chemosensory system involved in biofilm formation in *Pseudomonas aeruginosa* (41).  
280 BCAM0820 is homologous to WspR, but lacks the diguanylate cyclase domain. During  
281 an experimental evolution study in which *B. cenocepacia* HI2424 biofilms were grown  
282 on beads, mutations within the *wsp* gene cluster occurred in different clones; these  
283 were associated with increased pellicle formation and increased biofilm formation on  
284 beads. This demonstrates that the Wsp cluster is involved in pellicle formation in  
285 *B. cenocepacia* (42,43), and the upregulation of BCAM0820 could explain the  
286 differences in pellicle and biofilm formation between the wild type strains and the  
287  $\Delta$ BCAL3494 deletion mutants observed in the present study. Interestingly, BCAL1515,  
288 encoding 2-oxoglutarate dehydrogenase (SucA) and upregulated in  $\Delta$ BCAL3494, also  
289 acquired mutations in the course of the experimental evolution study (43), but the role of  
290 this gene in biofilm formation has not been further explored. BCAL0079, upregulated in  
291 the  $\Delta$ BCAM0992 mutants, is annotated as a DNA helicase gene (*rep*). Besides  
292 unwinding DNA during DNA replication, Rep plays a role in swimming motility in *E. coli*  
293 (44). The reduced motility observed in the  $\Delta$ BCAM0992 mutants suggests that Rep may  
294 also affect motility in *B. cenocepacia*, although this remains to be confirmed.

295 Measurement of eGFP production in translational fusion mutants revealed that  
296 mutants with constructs containing the BCAL1515, BCAM0820, or BCAL0079 promoter,  
297 showed a significant increase in eGFP production compared to wild type, thereby  
298 supporting our hypothesis of gene expression regulation by DNA methylation. *In silico*  
299 analyses predict that sequences containing methylation motifs are similar to binding  
300 sites of TF in *E. coli* K12, and it is plausible that these sequences are also part of TF  
301 binding sites in *B. cenocepacia*, allowing us to propose a possible mechanism of gene  
302 expression regulation (Figure 9). TFs that bind close to the -10 and -35 region often act  
303 as transcriptional repressors (45). Therefore, a methylated promoter region could  
304 promote binding of a repressor (46), and sterically hinder RNA polymerase (OFF state),  
305 whereas an absence of methylation would allow binding of the initiation factor sigma to  
306 the promoter, which in turn could lead to binding of RNA polymerase and initiation of  
307 transcription (ON state).

308 The role of DNA methylation in prokaryotes is multifaceted. Besides gene  
309 expression regulation and a role in DNA mismatch repair in Gram-positive bacteria (47),  
310 DNA methylation has also been implicated in the coordination of replication initiation.  
311 Results of the present study seem to confirm this, as the *rep* gene, necessary for  
312 replication, was found to be under epigenetic control by DNA methylation. In *E. coli*,  
313 GATC motifs, omnipresent in the replication origin, are prone to adenine methylation.  
314 The motifs are found within DnaA boxes, essential for binding of the DnaA protein and  
315 initiation of replication. The methylation state of each of these GATC motifs changes the  
316 affinity of DnaA and sequestering-protein SeqA for the DnaA box. Immediately after  
317 replication, GATC motifs are hemi-methylated, which leads to sequestration of the DnaA

318 boxes by SeqA and prevents the process of replication to be reinitiated (21). The  
319 occurrence of methylated motifs in the vicinity of the origins of replication of the four  
320 replicons in *B. cenocepacia* was studied to check for a link between DNA methylation  
321 and coordination of the replication process. An enrichment of the CACAG motif was  
322 observed in the origin of replication of all replicons. The motif was found to be part of a  
323 bigger sequence that has previously been reported as a recurring 7-mer (30), without  
324 known function. In addition, the origin of replication of the different replicons showed  
325 high similarities in methylation patterns, raising the possibility of replication coordination  
326 by DNA methylation.

327 In conclusion, we have demonstrated that DNA methylation plays a role in  
328 regulation of gene expression in *B. cenocepacia*. DNA MTases BCAL3494 and  
329 BCAM0992 are essential for methylation of the *B. cenocepacia* genome, and are  
330 responsible for methylation of base motifs CACAG and GTWWAC, respectively. In  
331 absence of methylation, expression of certain genes is affected and this results in  
332 altered phenotypes (including cell clustering, biofilm formation, and motility). Finally,  
333 recurrent methylation patterns were detected in all origins of replication, which suggests  
334 an additional role of DNA methylation in replication regulation.

## 335 **Materials and Methods**

### 336 **Strains and culture conditions**

337 All strains and plasmids used in this study are listed in Table 3. *B. cenocepacia*  
338 strains were cultivated in phosphate buffered mineral medium (2.00 g/L NH<sub>4</sub>Cl, 4.25 g/L  
339 K<sub>2</sub>HPO<sub>4</sub>·3H<sub>2</sub>O (ChemLab), 1.00 g/L NaH<sub>2</sub>PO<sub>4</sub>·H<sub>2</sub>O, 0.10 g/L nitrioloacetic acid, 0.0030  
340 g/L MnSO<sub>4</sub>·H<sub>2</sub>O, 0.0030 g/L ZnSO<sub>4</sub>·7H<sub>2</sub>O, 0.0010 g/L CoSO<sub>4</sub>·7H<sub>2</sub>O, 0.20 g/L

341 MgSO<sub>4</sub>·7H<sub>2</sub>O, 0.012 g/L FeSO<sub>4</sub>·7H<sub>2</sub>O (Sigma-Aldrich), 5 g/L Yeast Extract (Lab M), 2  
342 g/L Casamino Acids (BD Biosciences), and 5 g/L glycerol (Scharlab)). LB medium (Luria  
343 Bertani medium with 5g/L NaCl, Sigma-Aldrich) was used for maintenance of *E. coli*  
344 strains and during specific stages of the gene deletion procedure (see below) where  
345 antibiotic selection with tetracycline (250 µg/mL) (Sigma-Aldrich) was desired. Prior to  
346 phenotypic experiments, liquid overnight (ON) cultures were grown in a shaker  
347 incubator (100 rpm) at 37 °C.

#### 348 **Selection of DNA MTase genes – *in silico***

349 The REBASE Genome database was used to allocate all known DNA MTase  
350 genes in the *B. cenocepacia* J2315 and K56-2 genomes (48). The Artemis Genome  
351 Browser and Annotation Tool (Sanger) allowed to visualize the genomic context of  
352 these genes (49). NCBI BLAST was used to screen for conservation of the genes within  
353 the *Burkholderia* genus using default search parameters (50) (search mode: BLASTn, E  
354 cut-off value: < 1E-5).

#### 355 **Construction of deletion mutants**

356 All primers used for construction and complementation of the deletion mutants  
357 are listed in Table S6. The procedure is an adapted allelic replacement approach, using  
358 a suicide plasmid with a SclI endonuclease recognition site (51,52). The suicide  
359 plasmid, containing DNA fragments of regions flanking the target gene, is integrated into  
360 the *B. cenocepacia* genome by homologous recombination. Introducing a second  
361 plasmid that carries SclI endonuclease genes into *B. cenocepacia*, results in a lethal  
362 genomic strand break. Another homologous recombination event allows the bacteria to  
363 repair the break with a 50 % chance of resulting in a gene deletion. Deletion mutants



364  $\Delta$ BCAL3494 and  $\Delta$ BCAM0992 were constructed in both *B. cenocepacia* J2315 and  
365 K56-2.

366 BCAL3494 was deleted together with neighboring gene BCAL3493, as well as  
367 BCAL3488 to BCAL3492 (encoding hypothetical proteins). Targeting BCAL3494 alone  
368 was not feasible because regions flanking BCAL3494 contain multiple recognition sites  
369 for endonucleases used during construction of the deletion mutants, and digestion of  
370 these regions would be inevitable (Figure S1).

371 *E. coli* One Shot PIR2 cells (Thermo Fisher), expressing  $\lambda$  *pir*, were used for  
372 transformation, replication, and maintenance of the suicide plasmid during construction  
373 of deletion mutants. Thawed cells were immediately exposed to a heat shock  
374 transformation procedure, after which they were transferred to SOC medium for  
375 recovery. For plasmid selection, the phosphate buffered mineral medium was  
376 supplemented with one or more of following antibiotics: trimethoprim (Ludeco; 50  $\mu$ g/mL  
377 for initial screening in *E. coli*, 200  $\mu$ g/mL when plasmid is introduced in *B. cenocepacia*),  
378 chloramphenicol (400  $\mu$ g/mL), gentamicin (50  $\mu$ g/mL), kanamycin (50  $\mu$ g/mL), and  
379 ampicillin (200  $\mu$ g/mL) (Sigma-Aldrich).

### 380 **Construction of plasmids for complementation**

381 To ensure that phenotypes were solely caused by the deletion of DNA MTases,  
382 deletion mutants were complemented. The primers used for construction of plasmids  
383 used for complementation are listed in Table S6. Plasmids pJH2 and pSCrhaB2 were  
384 used for complementation of  $\Delta$ BCAL3494 (*c* $\Delta$ BCAL3494) and  $\Delta$ BCAM0992  
385 (*c* $\Delta$ BCAM0992), respectively. The genomic sequences of the DNA MTase genes were  
386 PCR-amplified and subsequently cloned into the plasmids. BCAL3494 was amplified

387 including its own regulatory region (approx. 250 nucleotides upstream of the  
388 transcription start site) into pJH2, which does not have a promoter associated with its  
389 multiple cloning site (53). BCAM0992 does not have its own upstream promoter,  
390 therefore it was cloned into pSCrhaB2, which contains a rhamnose-inducible promoter  
391 (54). Complemented mutant strains were subjected to the same phenotypic tests as the  
392 deletion mutants and wild type *B. cenocepacia*. For strains  $c\Delta$ BCAM0992, the  
393 phosphate buffered mineral medium was supplemented with 0.2 % rhamnose.

#### 394 **Biofilm and clustering experiments**

395 Biofilms were grown in plastic U-shaped 96-well microtiter plates in phosphate  
396 buffered medium at 37 °C, starting from 200  $\mu$ L/well planktonic overnight cultures with  
397 an optical density (OD) of 0.05 (590 nm). After 4 h static incubation, all wells were  
398 rinsed with physiological saline (PS, 0.9 % NaCl in water), thereby removing all  
399 unattached planktonic cells. Wells were re-filled with 200  $\mu$ L medium and incubated for  
400 an additional 20 h. Where appropriate, biofilms were stained with LIVE/DEAD  
401 (SYTO9/propidium iodide, Invitrogen) to visualize the bacteria and distinguish live and  
402 dead cells (55). Pellicle formation was determined in glass tubes. Cultures were grown  
403 statically for 24 h, after which adhering pellicles were stained and quantified with crystal  
404 violet (56). Cell clustering, already shown to be correlated with pellicle formation, was  
405 determined with flow cytometry (Attune NxT Flow Cytometer, Thermo Fisher) (57).  
406 Forward scatter (FCS), a value for particle size, and side scatter (SSC), a value for  
407 particle complexity, were measured for each particle present in the bacterial suspension  
408 and visualized in scatter plots. After analysis of these graphs, the main cell population

409 was gated (gate ranging from approx.  $10^3$  to  $10^5$  for both FSC and SSC), and detected  
410 events larger and more complex than the gate, were considered clustered (Figure S6).

#### 411 **Motility experiments**

412 Petri dishes containing phosphate buffered mineral medium with agar  
413 concentrations of 0.3 % and 0.5 % were used for assessment of swimming and  
414 swarming motility, respectively. 1  $\mu$ L of cultures with OD 0.1 was spotted on the agar  
415 plates. Diameters were measured after 24 h (strain K56-2) or 32 h (strain J2315).

#### 416 **DNA MTase inhibition with sinefungin**

417 A stock solution of the DNA MTase inhibitor sinefungin (Sigma-Aldrich) was  
418 prepared (10 mg/mL) (29), aliquoted, and immediately frozen at -20 °C to prevent  
419 degradation. Cells were grown for 24 h in sinefungin-supplemented medium (50  $\mu$ g/mL)  
420 and used as inoculum for an overnight culture, also in sinefungin supplemented  
421 medium. This allowed the DNA MTase inhibitor to have an effect during several growth  
422 cycles. Then, biofilm formation and motility of sinefungin-treated cells was assessed as  
423 described above in medium supplemented with 50  $\mu$ g/mL sinefungin.

#### 424 **Genomic DNA extraction**

425 Prior to DNA extraction, planktonic strains were grown overnight in a shaker  
426 incubator (100 rpm) at 37 °C. Biofilm cells were grown as described above. Next, cells  
427 were harvested and genomic DNA (gDNA) was extracted using the Wizard Genomic  
428 DNA Purification Kit (Promega). Quantification was performed with a BioDrop  $\mu$ LITE  
429 (BioDrop) spectrophotometer.

## 430 **SMRT sequencing**

431 To determine the methylome of *B. cenocepacia*, gDNA extracts were analyzed  
432 with Single Molecule Real-Time (SMRT) Sequencing technology. gDNA samples of  
433 both wild type and mutant strains were run on a Pacific Biosciences Sequel System  
434 (250x coverage) according to the manufacturer's guidelines. Library preparations were  
435 multiplexed as data output of approximately 2 Gb per genome was expected, and a  
436 single SMRT Sequel cell provides up to 6 Gb data. Initial data output was processed  
437 with SMRT Link software (Pacific Biosciences). Identification of the modified bases and  
438 analysis of the methylated motifs was performed with the Base Modification and Motif  
439 Analysis application (SMRT Link v6.0, Pacific Biosciences). In depth data analysis was  
440 performed with CLC Workbench Genomics (v11.0.1, Qiagen). Differential analysis  
441 between wild type and mutants was performed to identify methylation motifs specifically  
442 associated with certain DNA MTases. Previously predicted promoter regions and  
443 transcription start sites of *B. cenocepacia* were used to determine the methylation  
444 profile of regulatory regions (58). Virtual Footprint software (promoter analysis mode,  
445 default search parameters) was used to assess similarity of the methylation motifs to  
446 known TF binding sites (59).

## 447 **qPCR**

448 To evaluate the impact of DNA methylation in promoter regions on gene  
449 expression, qPCR was performed on all genes that had a methylated promoter region in  
450 wild type *B. cenocepacia*, but an absence of methylation in promoter region in one of  
451 the deletion mutants. All hypothetical genes and genes with unknown function, as well  
452 as genes with low innate expression level, were excluded from testing. The primers

453 used for qPCR are listed in Table S7. First, all strains were grown to an OD of 0.6 in  
454 phosphate buffered medium, after which they were pelleted by centrifugation and frozen  
455 at -80 °C. Next, RNA was extracted using the RiboPure – Bacteria extraction kit  
456 (Invitrogen), followed by a DNase treatment to remove trace quantities of gDNA.  
457 Quantification and measurement of RNA purity of the extracts was performed with a  
458 BioDrop  $\mu$ LITE (BioDrop). Subsequently, cDNA was synthesized, using 500 ng RNA per  
459 reaction, with a Reverse Transcriptase kit (High-Capacity cDNA RT Kit, Applied  
460 Biosystems). Per qPCR reaction, 2  $\mu$ L template cDNA was mixed with 10  $\mu$ L GoTaq  
461 qPCR Master Mix, 0.6  $\mu$ L qPCR primer mix (10  $\mu$ g/mL), and 7.4  $\mu$ L nuclease-free water  
462 according to the GoTaq qPCR Master Mix (Promega) protocol. Samples were run on a  
463 CFX96 Real-Time System C1000 Thermal Cycler (Bio-Rad) and output data was  
464 processed with Bio-Rad CFX Manager 3.1 software. The baseline threshold was set to  
465 a defined 100 RFU. Obtained Cq values were normalized to reference gene *rpoD*  
466 (BCAM0918) of which the expression was stable across all samples, differences to wild  
467 type were calculated ( $\Delta\Delta$ Cq) and log-transformed. Volcano plots were used to plot the  
468 negative logarithm of statistical p-values against log 2-fold changes (Figure S5).

#### 469 **Construction of translational eGFP reporter fusions and measurement of eGFP** 470 **production**

471 Genes with methylated promoter regions that showed a significant upregulation  
472 of gene expression in one of both mutant strains, were selected for eGFP experiments.  
473 Translational eGFP reporter fusion plasmids were constructed by cloning the regulatory  
474 regions of the genes, comprising 60 to 390 nucleotides upstream of the transcription  
475 start site, into vector pJH2. The insert is cloned right in front of the eGFP gene and

476 contains an ATG start codon at the 3'-end, in frame with the codon sequence of the  
477 gene. All primers used for amplification of the regulatory regions and screening of pJH2  
478 with correct insert length, are listed in Table S8. The plasmids were transferred to *B.*  
479 *cenoepectia* J2315 and K56-2 by triparental mating. Exconjugants were grown on  
480 selective plates (LB medium supplemented with 200 µg/mL chloramphenicol and 50  
481 µg/mL gentamicin) and PCR-screened to confirm the presence of the insert. Constructs  
482 carrying genes BCAL2415, BCAL2465 and BCAM1362 repeatedly failed to be  
483 transformed into *B. cenoepectia* and were not included in further experiments.  
484 Fluorescent signals of eGFP production in wild type and mutant strains were measured  
485 by flow cytometry (Attune NxT Flow Cytometer, Thermo Fisher) (53).

#### 486 **Data analysis and statistics**

487 Statistical analysis was performed using SPSS Statistics v. 25 software. All tests  
488 and experiments were run in triplicate unless otherwise mentioned. Normality of data  
489 was verified with a Shapiro-Wilk test. To check for significant differences between data,  
490 normally distributed data was subjected to a T-test or One-way ANOVA test, not  
491 normally distributed data to a non-parametric Mann-Whitney U-test. Resulting p-values  
492 smaller than 0.05 were reported as statistically significant.

#### 493 **Acknowledgements**

494 This work was funded by the Special Research Fund of Ghent University  
495 (Bijzonder Onderzoeksfonds, BOF, grant number BOFDOC2016001301) and the Swiss  
496 National Science Foundation (31003A\_169307).

497 **Figures**

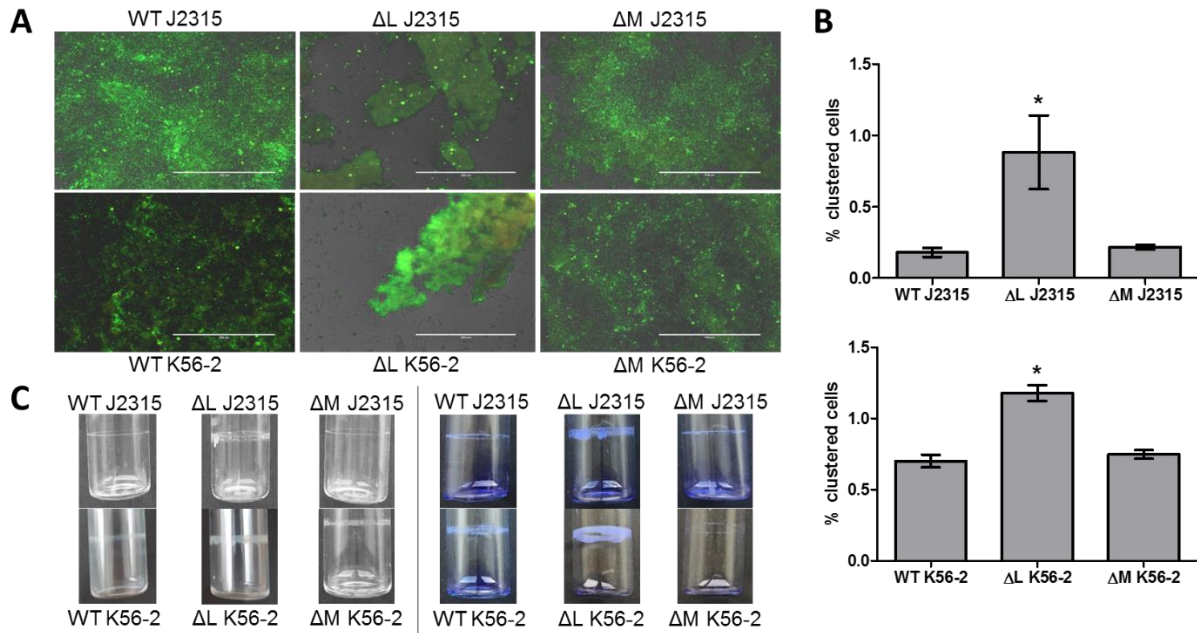

498

499 **FIGURE 1** Effect of DNA MTase deletion on biofilm structure, cell aggregation, and  
500 pellicle formation in *B. cenocepacia* J2315 and K56-2. (A) Microscopic images of  
501 LIVE/DEAD stained biofilms, grown in microtiter plate wells for 24 h. White bar (200  $\mu$ m)  
502 for scale. (B) Clustering of cells in planktonic cultures, quantified with flow cytometry.  
503 (C) Pellicle formation inside glass tubes after 24 h of static incubation. Left pictures  
504 represent unstained samples, right pictures display pellicles stained with crystal violet.  
505 (n=3, \* p < 0.05 compared to wild type, error bars represent the standard error of the  
506 mean (SEM)). WT: wild type,  $\Delta$ L: deletion mutant  $\Delta$ BCAL3494,  $\Delta$ M: deletion mutant  
507  $\Delta$ BCAM0992)

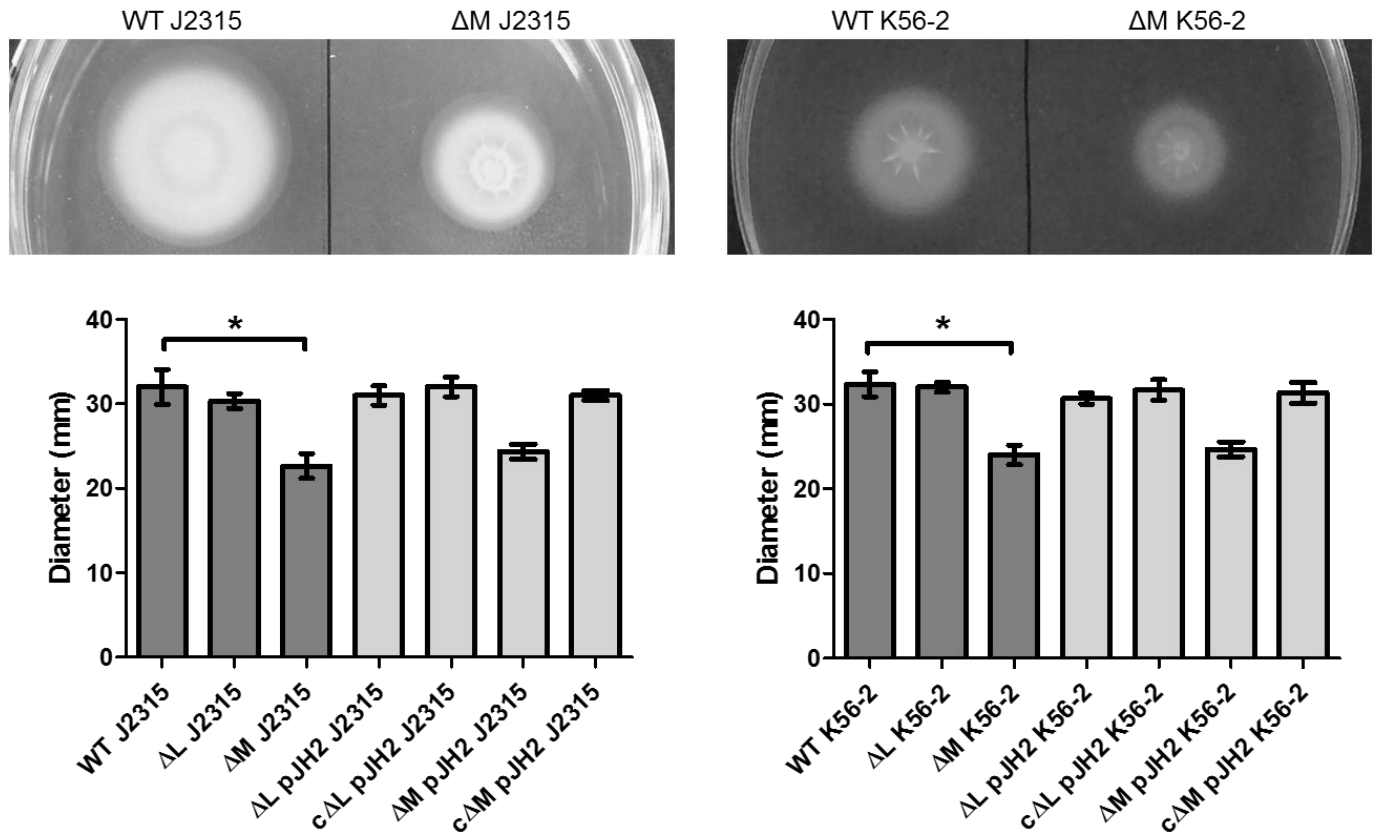

508

509 **FIGURE 2** Swimming motility of DNA MTase deletion mutants. Diameters were  
510 measured after 24 h (K56-2) or 32 h (J2315). (n=3, \* p < 0.05 compared to wild type,  
511 error bars represent the SEM. WT: wild type, ΔL: deletion mutant ΔBCAL3494, ΔM:  
512 deletion mutant ΔBCAM0992, ΔL pJH2 and ΔM pJH2: mutant strains with empty vector  
513 pJH2 (vector control), cΔL pJH2 and cΔM pJH2: deletion mutants complemented with  
514 genes BCAL3494 and BCAM0992)

515

516



517

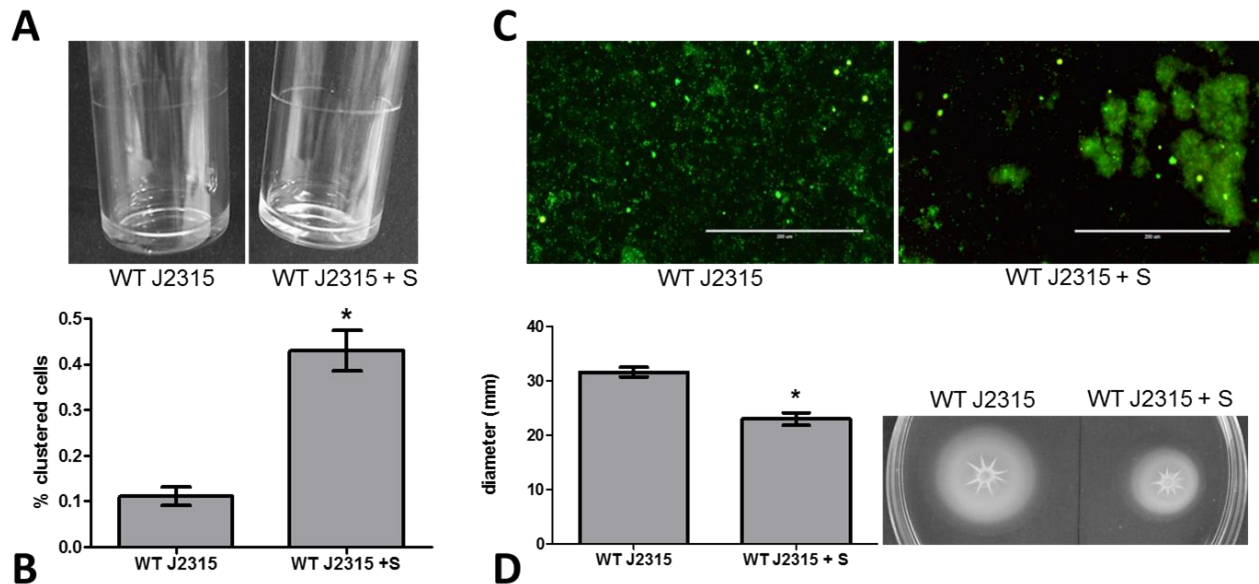

518

519 **FIGURE 3** Effect of DNA MTase inhibitor sinefungin on biofilm and pellicle formation,  
520 cell aggregation and motility. (A) Pellicle formation inside glass tubes after 24 h of static  
521 incubation. (B) Clustering of planktonic cultures analyzed with flow cytometry. (C)  
522 Microscopic images of LIVE/DEAD stained biofilms, grown on plastic surfaces in  
523 microtiter plates for 24 h. (D) Swimming motility of treated and untreated samples. (n=3,  
524 \*  $p < 0.05$  compared to wild type, error bars represent the SEM). WT: wild type, +S:  
525 medium supplemented with 50  $\mu\text{g}/\text{mL}$  sinefungin)

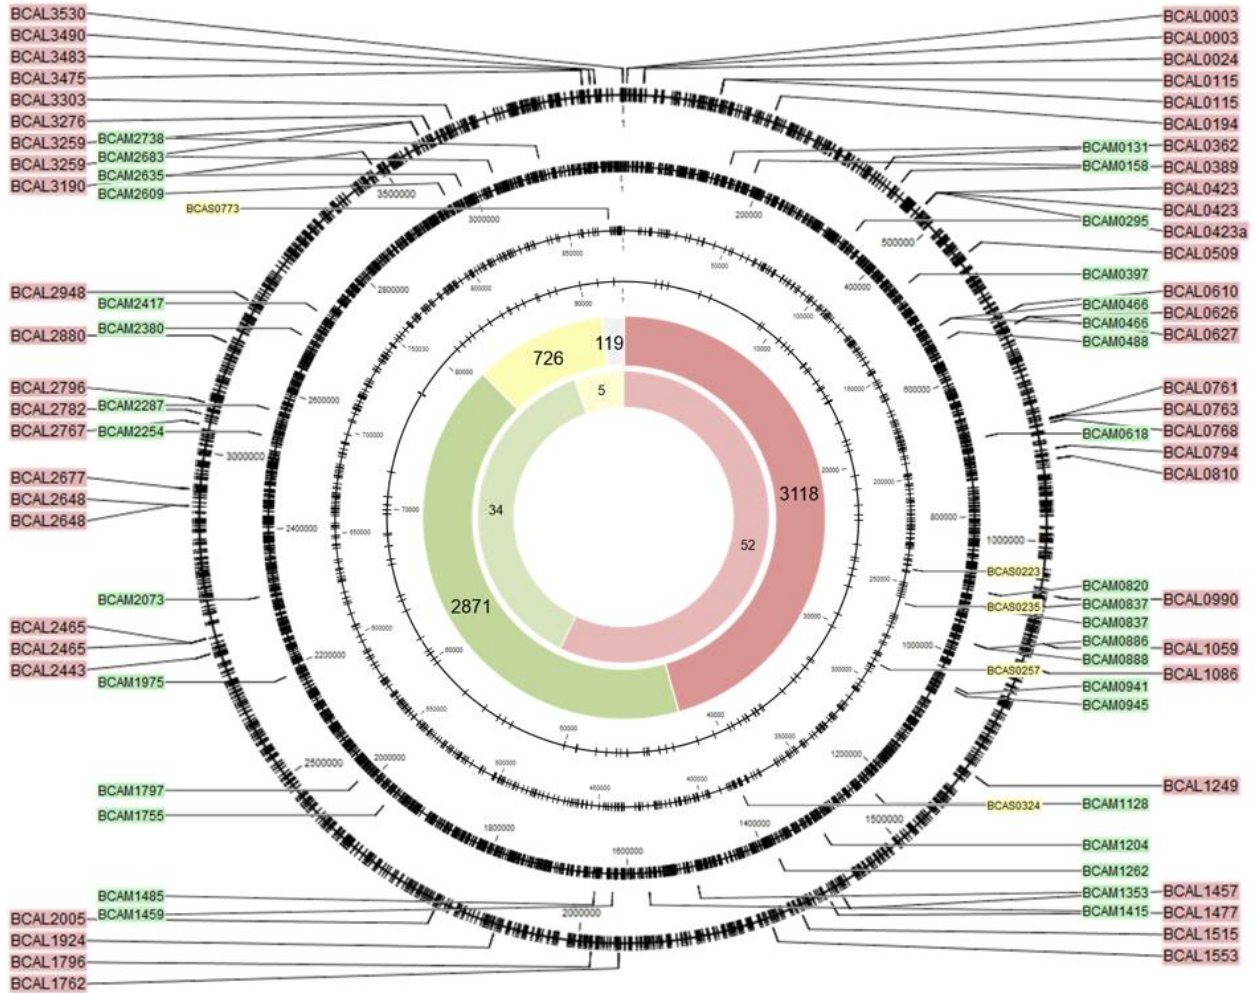

526

527 **FIGURE 4** Genomic position of all methylated CACAG motifs. Black circles represent  
 528 the four replicons of *B. cenocepacia*, black ticks mark the motif locations. The total  
 529 number of methylated CACAG motifs and methylated CACAG motifs in promoter  
 530 regions, per replicon (red: replicon 1, green: replicon 2, yellow: replicon 3, and grey:  
 531 plasmid), is shown on the large and small inner circle, respectively. The position and  
 532 names of genes with methylated promoter regions is indicated with colored labels  
 533 (same color code).

534

535

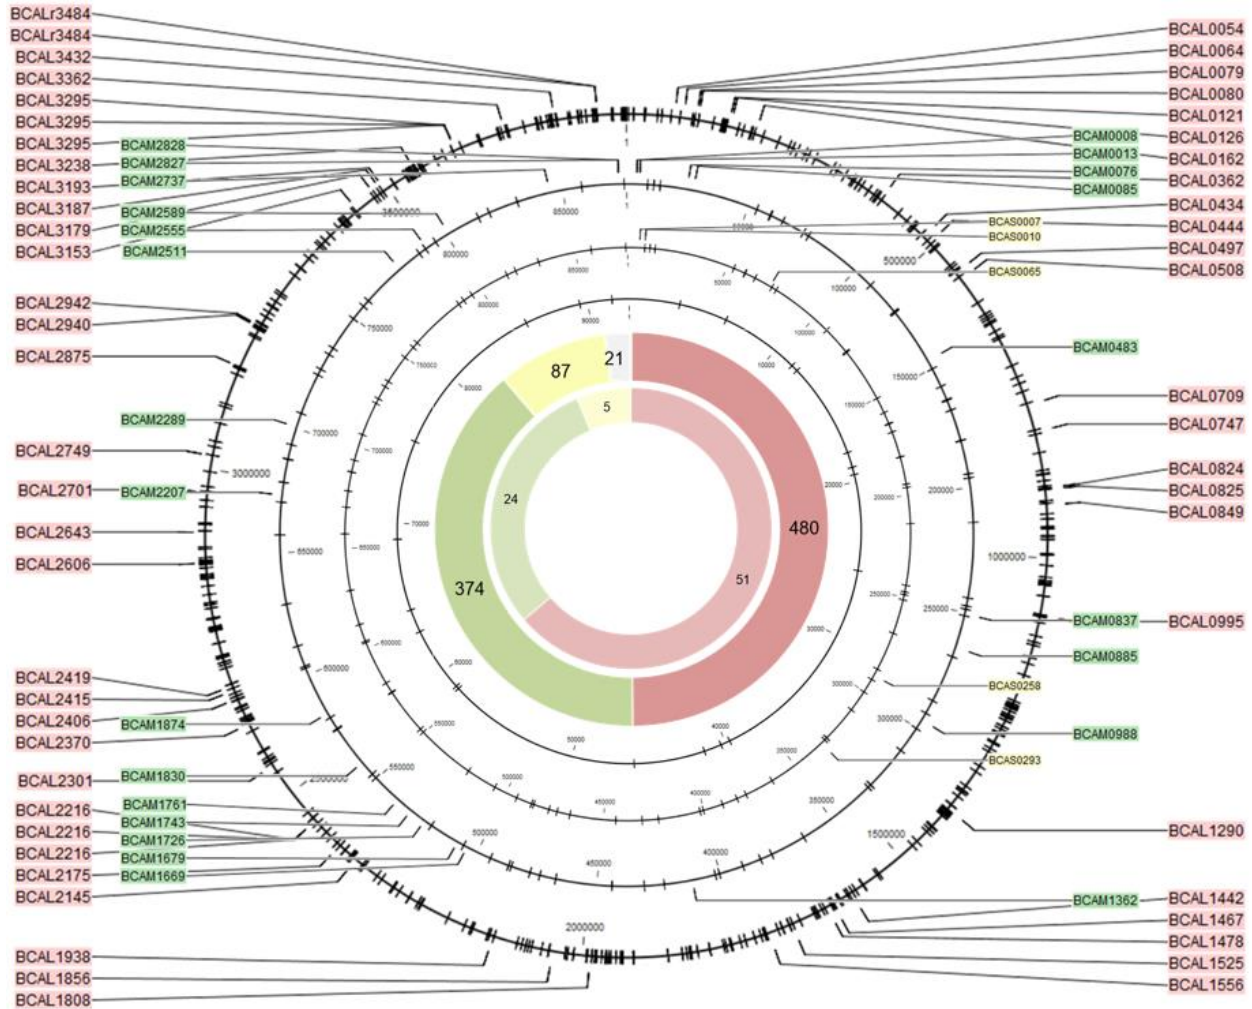

536

537 **FIGURE 5** Genomic position of all methylated GTWWAC motifs. Black circles represent  
 538 the four replicons of *B. cenocarpica*, black ticks mark the motif locations. The total  
 539 number of methylated GTWWAC motifs and methylated GTWWAC motifs in promoter  
 540 regions, per replicon (red: replicon 1, green: replicon 2, yellow: replicon 3, and grey:  
 541 plasmid), is shown on the large and small inner circle, respectively. The position and  
 542 names of genes with methylated promoter regions is indicated with colored labels  
 543 (same color code).

|          | -10                                                                           | -30 | 544 |                  |
|----------|-------------------------------------------------------------------------------|-----|-----|------------------|
| <b>A</b> |                                                                               |     |     |                  |
| BCAL1515 | TGCGGCGAGCATAT <b>CACAG</b> AACCGATAACGGAGTTCACGGCGAAATGTGCCTGAAAGCT          |     |     | J2315 +<br>K56-2 |
| BCAL2465 | GATCGATAAAATAAAATCAATTGACTGTGGCGCAACTTGCCACATT <b>CTGTG</b> TCGGTTCG          |     |     |                  |
| BCAM0820 | CCGGCTGATCTCTAAATGAAATTACAA <b>CACAG</b> CATCTATCTCCTTCCGGTTAGTTTTGC          |     |     |                  |
| BCAL0423 | GGCGAGATTCTAACCCAAACGCGGG <b>CACAG</b> CGGACTTAT <b>CACAG</b> GCCGGTTGTGTG    |     |     |                  |
| BCAM2738 | ATCGGCGATTTTAAACCTATCGGGCCGTC <b>CGTGC</b> TTGGT <b>GTGTG</b> TCGGCACCGTTGC   |     |     |                  |
| BCAS0223 | GTTTGCAATCTTCT <b>GTG</b> AGTCGATGTTT <b>CGGAC</b> AAACGAATTTCCGAACGCATTGCA   |     |     |                  |
| <b>B</b> |                                                                               |     |     |                  |
| BCAL0079 | GACGCGCAT <b>GTTAAC</b> ACGTCGGCGGCGGGTATTTT <b>CGGG</b> CGCGCCCGCGACGGGGCGCG |     |     | J2315 +<br>K56-2 |
| BCAL2415 | GGCTTCGAT <b>GTTAAC</b> ACGGGCATCCGGGCGGGTTGGGCGGTTTGGTCGCGCCACGCC            |     |     |                  |
| BCAM1362 | AATGCAATTGTAATAAATG <b>GTTAAC</b> ACCGTGTGGGAAAGTATGTTCCGGCCCCGCAA            |     |     | K56-2            |
| BCAL1556 | ACGCCA <b>GTTTAC</b> CGAGTCGGCGGACGCGCCCGCGTTTTTTCGGCGTCGGGGCGTTCG            |     |     |                  |

545 **FIGURE 6** Position of methylated motifs relative to gene start for genes of which the  
546 expression is upregulated in DNA MTase deletion mutants. (A) Genes with methylated  
547 CACAG motifs in their corresponding promoter region. (B) Genes with methylated  
548 GTWWAC motifs in their corresponding promoter region. The motifs are marked in bold,  
549 the position of -10 and -30/35 elements in bacterial promoters are framed. ('J2315 +  
550 K56-2': upregulation in both strains, 'K56-2': upregulation in strain K56-2 only)

551

552

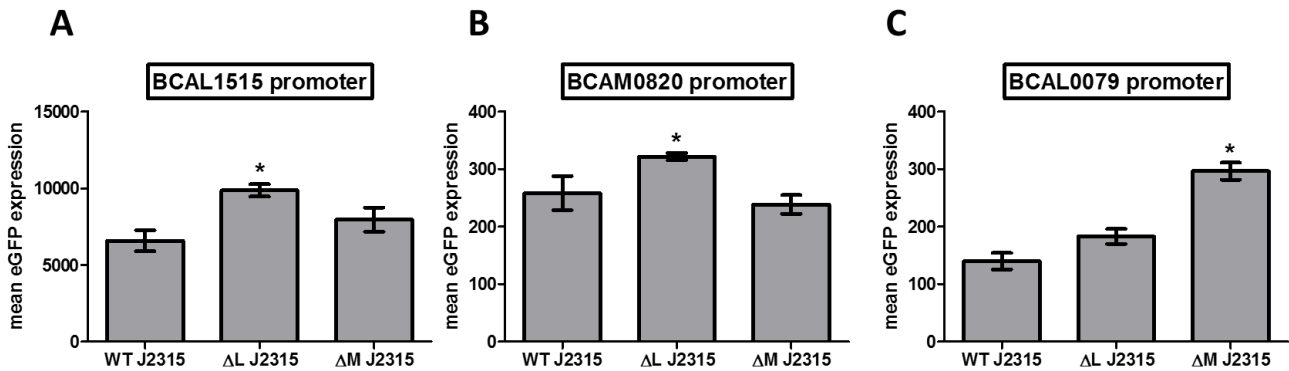

553

554 **FIGURE 7** eGFP production in *B. cenocepacia* J2315 strains harboring a pJH2 plasmid  
555 that contains a BCAL1515 promoter-eGFP construct (A), a BCAM0820 promoter-eGFP  
556 construct (B), or a BCAL0079 promoter-eGFP construct (C). BCAL 1515 and  
557 BCAM0820 are associated with methylation of the CACAG motif by DNA MTase  
558 BCAL3494, BCAL0079 is associated with methylation of the GTWWAC motif by DNA  
559 MTase BCAL0992 (n=3, \*  $p < 0.05$  compared to wild type, error bars represent the  
560 SEM). WT: wild type,  $\Delta L$ : deletion mutant  $\Delta BCAL3494$ ,  $\Delta M$ : deletion mutant  
561  $\Delta BCAM0992$ ).

562

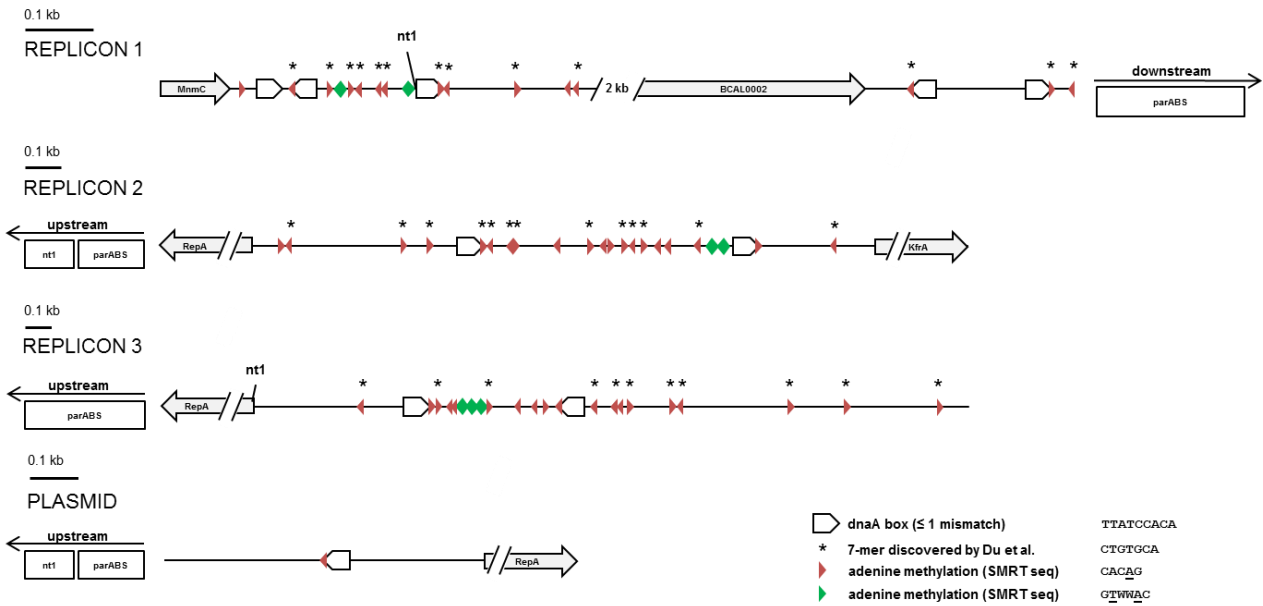

563

564 **FIGURE 8** Methylation in the origin of replication of the different replicons in  
 565 *B. cenocepacia* J2315. SMRT sequencing was used to detect methylated CACAG (red  
 566 triangles) and GTWWAC (green triangles) motifs within these regions. DnaA boxes  
 567 (TTATCCACA, consensus sequence of DnaA boxes in *E. coli*) are indicated in the  
 568 figure. CACAG motifs were frequently found to be part of a previously discovered 7-mer  
 569 (sense: CTGTGCA, antisense: TGCACAG) (30). The positions of these 7-mers are  
 570 indicated with an asterisk. (nt1, nucleotide 1; parABS genes, responsible for  
 571 chromosome segregation in *B. cenocepacia*)

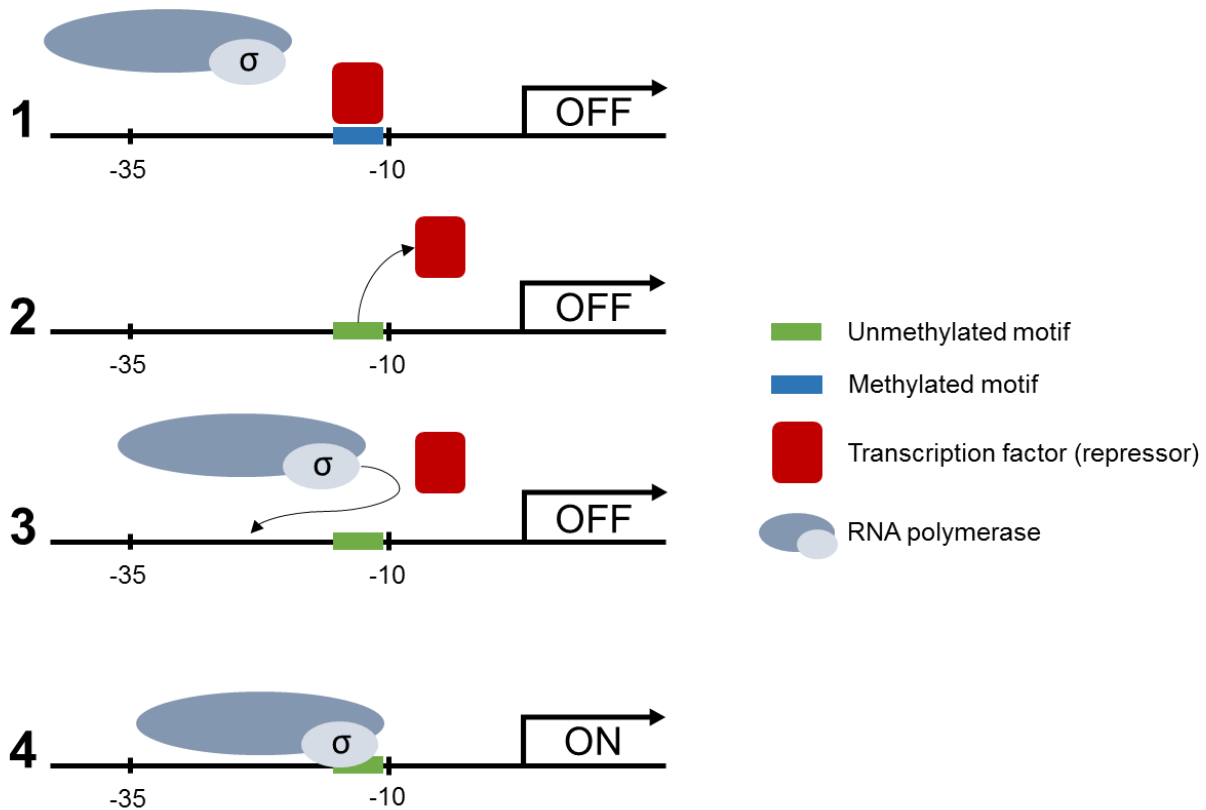

572

573 **FIGURE 9** Proposed mechanism of regulation of gene expression in *B. cenocepacia*.  
574 (1) Methylated motifs in the promoter region of the gene are bound by a TF, acting as  
575 repressor (OFF state). (2) In absence of methylation in the promoter region, the TF  
576 dissociates from the motif and vacates the promoter region. (3) The sigma factor is no  
577 longer sterically hindered by a repressor and is able to bind to the promoter region. (4)  
578 RNA polymerase can access the promoter region and start transcription of the gene  
579 (ON state).

580

581

## 582 Tables

583 **TABLE 1** Expression changes of genes with a methylated CACAG motif in their  
584 promoter region in deletion mutants compared to wild type.

| Locus tag       | J2315       |         | K56-2       |         | Gene function                                                                                      |
|-----------------|-------------|---------|-------------|---------|----------------------------------------------------------------------------------------------------|
|                 | Fold change | p-value | Fold change | p-value |                                                                                                    |
| <b>BCAL0003</b> | 0.954       | 0.791   | 1.242       | 0.214   | MarR family regulatory protein                                                                     |
| <b>BCAL0024</b> | 1.477       | 0.143   | 0.909       | 0.678   | GidA tRNA uridine 5-carboxymethylaminomethyl modification enzyme                                   |
| <b>BCAL0423</b> | 1.169       | 0.306   | 1.948       | 0.014   | DnaA chromosomal replication initiation protein                                                    |
| <b>BCAL0509</b> | 1.129       | 0.473   | 1.175       | 0.199   | MetK S-adenosylmethionine synthetase                                                               |
| <b>BCAL1059</b> | 1.129       | 0.662   | 0.767       | 0.457   | ArgD bifunctional N-succinyldiaminopimelate-amino transferase/acetylornithine transaminase protein |
| <b>BCAL1457</b> | 1.343       | 0.309   | 1.793       | 0.056   | LysR family regulatory protein                                                                     |
| <b>BCAL1515</b> | 1.790       | 0.032   | 1.869       | 0.012   | SucA 2-oxoglutarate dehydrogenase E1 component                                                     |
| <b>BCAL2465</b> | 1.277       | 0.047   | 2.042       | 0.014   | TetR family regulatory protein                                                                     |
| <b>BCAL2767</b> | 1.281       | 0.270   | 1.397       | 0.382   | ArgF ornithine carbamoyltransferase                                                                |
| <b>BCAL2782</b> | 1.373       | 0.237   | 1.166       | 0.668   | PdxH pyridoxamine 5'-phosphate oxidase                                                             |
| <b>BCAL3303</b> | 1.048       | 0.845   | 1.093       | 0.071   | QueA S-adenosylmethionine:tRNA ribosyltransferase-isomerase                                        |
| <b>BCAM0820</b> | 2.621       | 0.004   | 2.253       | 0.002   | hybrid two-component system kinase-response regulator protein                                      |
| <b>BCAM0941</b> | 1.240       | 0.448   | 1.761       | 0.050   | <i>gnd</i> 6-phosphogluconate dehydrogenase                                                        |
| <b>BCAM1262</b> | 1.237       | 0.397   | 1.163       | 0.445   | dihydroxy-acid dehydratase                                                                         |
| <b>BCAM1415</b> | 1.183       | 0.665   | 1.315       | 0.177   | AraC family regulatory protein                                                                     |
| <b>BCAM2738</b> | 1.213       | 0.147   | 1.649       | 0.022   | IspH 4-hydroxy-3-methylbut-2-enyl diphosphate reductase                                            |
| <b>BCAS0223</b> | 1.251       | 0.202   | 1.993       | 0.030   | AfcC fatty acid desaturase                                                                         |

585

586



587 **TABLE 2** Expression changes of genes with a methylated GTWWAC motif in their  
 588 promoter region in deletion mutants compared to wild type.

| Locus tag | J2315       |         | K56-2       |         | Gene function                                       |
|-----------|-------------|---------|-------------|---------|-----------------------------------------------------|
|           | Fold change | p-value | Fold change | p-value |                                                     |
| BCAL0054  | 0.487       | 0.127   | 0.641       | 0.107   | MerR family regulatory protein                      |
| BCAL0079  | 2.838       | 0.020   | 3.074       | 0.005   | <i>rep</i> ATP-dependent DNA helicase               |
| BCAL0126  | 0.845       | 0.356   | 0.801       | 0.607   | MotA chemotaxis protein                             |
| BCAL0162  | 0.139       | 0.634   | 0.133       | 0.478   | GmhA phosphoheptose isomerase                       |
| BCAL0508  | 1.015       | 0.934   | 1.721       | 0.137   | LpxL lipid A biosynthesis myristoyl acyltransferase |
| BCAL0709  | 1.599       | 0.104   | 0.763       | 0.430   | LipB lipoate-protein ligase B                       |
| BCAL1556  | 1.611       | 0.171   | 1.690       | 0.006   | RpiA ribose-5-phosphate isomerase A                 |
| BCAL2406  | 1.693       | 0.273   | 1.009       | 0.938   | WabR putative glycosyltransferase                   |
| BCAL2415  | 2.819       | 0.006   | 6.029       | 0.001   | PurT phosphoribosylglycinamide formyltransferase 2  |
| BCAL2701  | 0.613       | 0.076   | 1.519       | 0.170   | ArgD acetylornithine transaminase protein           |
| BCAL2942  | 1.143       | 0.474   | 1.451       | 0.274   | CysM cysteine synthase B                            |
| BCAM0076  | 1.630       | 0.112   | 1.358       | 0.051   | TetR family regulatory protein                      |
| BCAM1362  | 1.959       | 0.025   | 1.516       | 0.004   | putative penicillin-binding protein                 |
| BCAS0258  | 1.247       | 0.451   | 1.141       | 0.438   | GntR family regulatory protein                      |

589

590

591 **TABLE 3** Bacterial strains and plasmids.

| Strain/Plasmid                                   | Description                                                                                                                                           | Abbreviation            | Source       |
|--------------------------------------------------|-------------------------------------------------------------------------------------------------------------------------------------------------------|-------------------------|--------------|
| <b><i>B. cenocepacia</i></b>                     |                                                                                                                                                       |                         |              |
| J2315                                            | CF sputum isolate                                                                                                                                     | WT J2315                | LMG16656     |
| J2315 $\Delta$ BCAL3494                          | BCAL3494 MTase deletion mutant                                                                                                                        | $\Delta$ L J2315        | this study   |
| J2315 $\Delta$ BCAM0992                          | BCAM0992 MTase deletion mutant                                                                                                                        | $\Delta$ M J2315        | this study   |
| J2315 $\Delta$ BCAL3494 pJH2                     | BCAL3494 MTase mutant with empty pJH2 vector                                                                                                          | $\Delta$ L pJH2 J2315   | this study   |
| J2315 $\Delta$ BCAL3494 pJH2 + BCAL3494          | BCAL3494 MTase complemented deletion mutant                                                                                                           | c $\Delta$ L pJH2 J2315 | this study   |
| J2315 $\Delta$ BCAM0992 pJH2                     | BCAM0992 MTase mutant with empty pJH2 vector                                                                                                          | $\Delta$ M pJH2 J2315   | this study   |
| J2315 $\Delta$ BCAM0992 pJH2 + BCAM0992          | BCAM0992 MTase complemented deletion mutant                                                                                                           | c $\Delta$ M pJH2 J2315 | this study   |
| K56-2                                            | CF sputum isolate                                                                                                                                     | WT K56-2                | LMG 18863    |
| K56-2 $\Delta$ BCAL3494                          | BCAL3494 MTase deletion mutant                                                                                                                        | $\Delta$ L K56-2        | this study   |
| K56-2 $\Delta$ BCAM0992                          | BCAM0992 MTase deletion mutant                                                                                                                        | $\Delta$ M K56-2        | this study   |
| K56-2 $\Delta$ BCAL3494 pJH2                     | BCAL3494 MTase mutant with empty pJH2 vector                                                                                                          | $\Delta$ L pJH2 K56-2   | this study   |
| K56-2 $\Delta$ BCAL3494 pJH2 + BCAL3494          | BCAL3494 MTase complemented deletion mutant                                                                                                           | c $\Delta$ L pJH2 K56-2 | this study   |
| K56-2 $\Delta$ BCAM0992 pJH2                     | BCAM0992 MTase mutant with empty pJH2 vector                                                                                                          | $\Delta$ M pJH2 K56-2   | this study   |
| K56-2 $\Delta$ BCAM0992 pJH2 + BCAM0992          | BCAM0992 MTase complemented deletion mutant                                                                                                           | c $\Delta$ M pJH2 K56-2 | this study   |
| <b><i>E. coli</i></b>                            |                                                                                                                                                       |                         |              |
| DH5 $\alpha$                                     | Maintenance of replicative plasmids                                                                                                                   |                         | lab stock    |
| One Shot PIR2                                    | Maintenance of suicide plasmids with ori <sub>R6K</sub>                                                                                               | PIR2                    | ThermoFisher |
| <b>Plasmids</b>                                  |                                                                                                                                                       |                         |              |
| pGPI-Scel-XCm                                    | Suicide plasmid, Tp <sup>f</sup> , Cm <sup>r</sup> , I-SceI restriction site, ori <sub>R6K</sub>                                                      | pGPI                    | 44,45        |
| pDAI-Scel-SacB                                   | Replicative plasmid, Tet <sup>r</sup> , I-SceI nuclease, counterselectable marker SacB, ori <sub>pBBR1</sub>                                          | pDAI                    | 44,45        |
| pRK2013                                          | Helper plasmid, Km <sup>r</sup> , ori <sub>colEI</sub>                                                                                                | pRK                     | 44,45        |
| pJH2                                             | Broad-range translational fusion vector, Cm <sup>r</sup> , fluorescent marker eGFP: complementation of $\Delta$ BCAL3494                              |                         | 46           |
| pSCrhaB2                                         | Broad-range translational fusion vector, Tp <sup>f</sup> , rhaR, rhaS-P <sub>rhaB</sub> , ori <sub>pBBR1</sub> : complementation of $\Delta$ BCAM0992 |                         | 47           |
| pGPI + BCAL3494 upstream sequence                | pGPI-Scel-XCm with ligated upstream sequence BCAL3494, used during deletion                                                                           | pGPI <sub>UL</sub>      | this study   |
| pGPI + BCAL3494 upstream and downstream sequence | pGPI-Scel-XCm with ligated upstream and downstream sequence BCAL3494, used during deletion                                                            | pGPI <sub>UL-DL</sub>   | this study   |
| pGPI + BCAM0992 upstream sequence                | pGPI-Scel-XCm with ligated upstream sequence BCAM0992, used during deletion                                                                           | pGPI <sub>UM</sub>      | this study   |
| pGPI + BCAM0992 upstream and downstream sequence | pGPI-Scel-XCm with ligated upstream and downstream sequence BCAM0992, used during deletion                                                            | pGPI <sub>UM-DM</sub>   | this study   |

---

|                              |                                                                        |                           |            |
|------------------------------|------------------------------------------------------------------------|---------------------------|------------|
| pJH2 + BCAL3494 sequence     | Fusion vector with ligated BCAL3494 sequence, used for complementation | pJH2 <sub>L3494</sub>     | this study |
| pSCrhaB2 + BCAM0992 sequence | Fusion vector with ligated BCAM0992 sequence, used for complementation | pSCrhaB2 <sub>M0992</sub> | this study |

---

592

593

594 **Supplementary data**

595

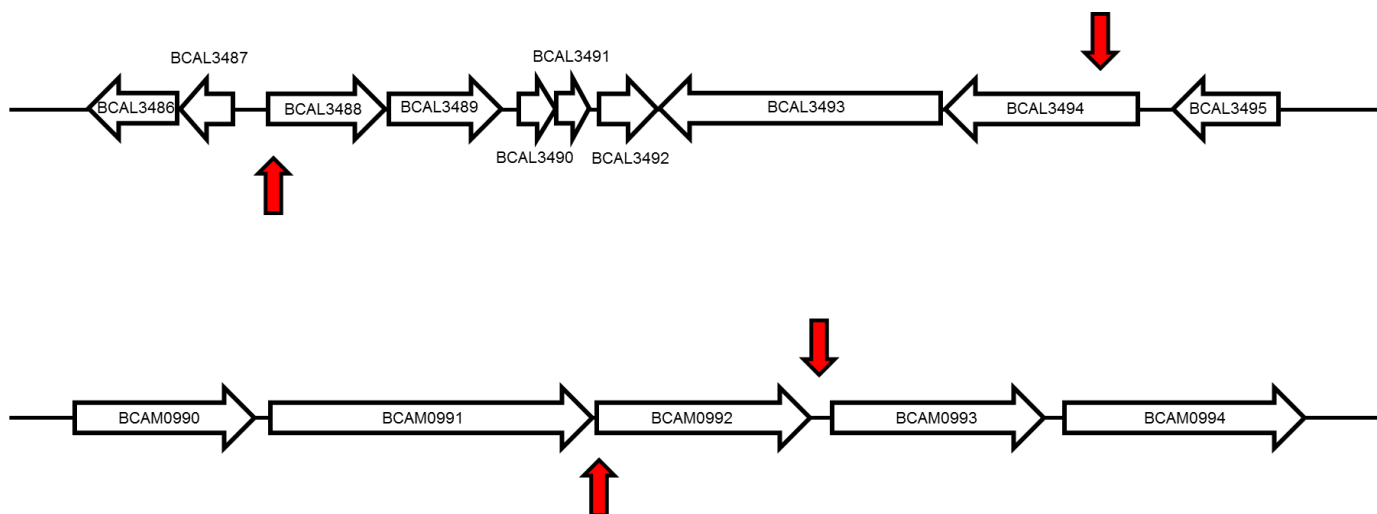

596

597 **FIGURE S1** Genome context of deleted DNA MTase genes BCAL3494 (top) and  
598 BCAM0992 (bottom). The red arrows indicate the boundaries of the deleted part. For  
599 gene BCAL3494, adjacent restriction gene BCAL3493, and hypothetical genes  
600 BCAL3488 to BCAL3492 were deleted as well.

601

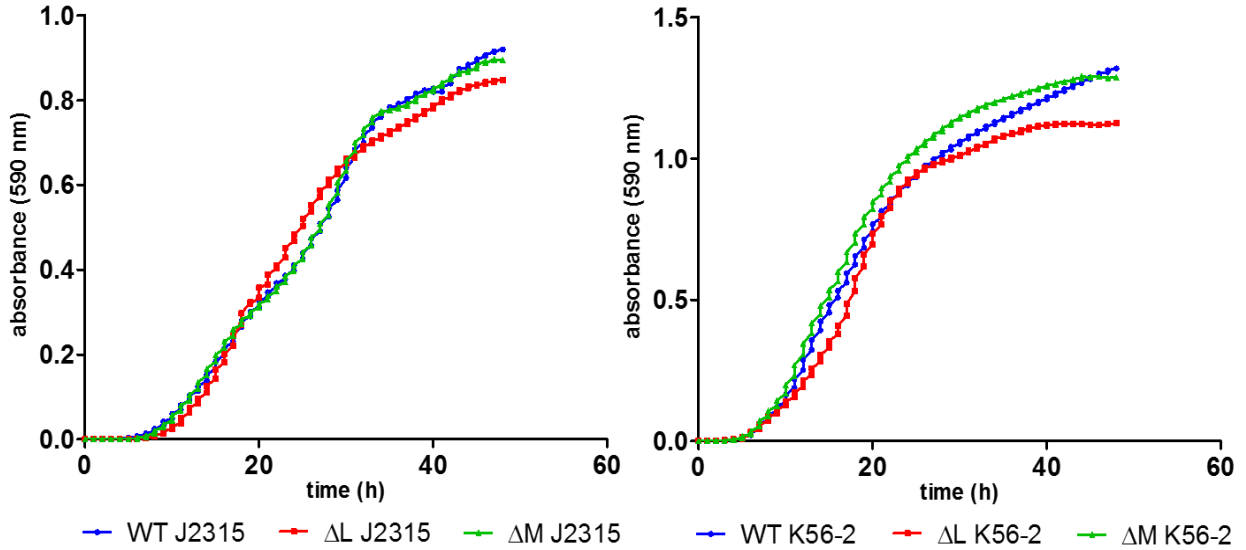

602

603 **FIGURE S2** Growth of *B. cenocepacia* J2315 (left) and K56-2 (right) in phosphate  
604 buffered minimal medium. (WT: wild type,  $\Delta L$ : deletion mutant  $\Delta BCAL3494$ ,  $\Delta M$ :  
605 deletion mutant  $\Delta BCAM0992$ )

606

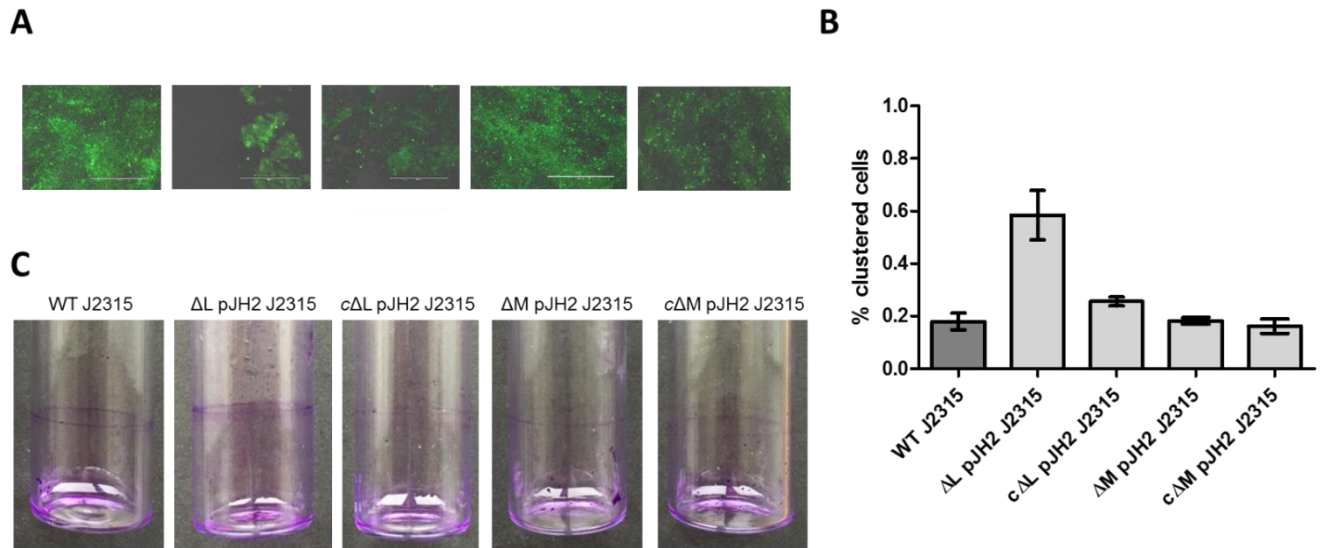

607

608 **FIGURE S3** Biofilm formation, cell aggregation, and pellicle formation of complemented  
609 DNA MTase mutants in *B. cenocepacia* J2315. (A) Microscopic images of LIVE/DEAD  
610 stained biofilms, grown in microtiter plate wells for 24 h. White bar (200  $\mu$ m) for scale.  
611 (B) Clustering of cells in planktonic cultures, analyzed with flow cytometry. (C) Pellicle  
612 formation inside glass tubes after 24 h of static incubation, stained with crystal violet.  
613 (n=3, error bars represent the Standard Error of the Mean (SEM). WT: wild type,  $\Delta$ L  
614 pJH2 and  $\Delta$ M pJH2: mutant strains with empty vector pJH2 (vector control), c $\Delta$ L pJH2  
615 and c $\Delta$ M pJH2: deletion mutants complemented with genes BCAL3494 and  
616 BCAM0992)

617

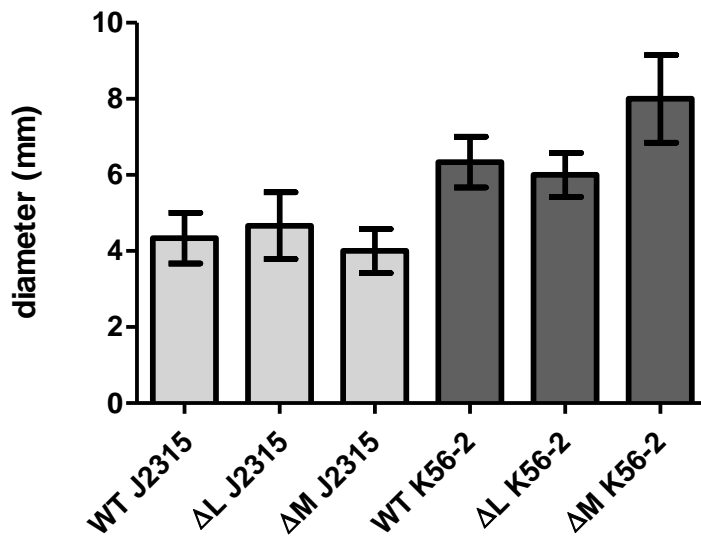

618

619 **FIGURE S4** Swarming motility of DNA MTase deletion mutants. Diameters were  
620 measured after 24 h. (n=3, error bars represent the SEM. WT: wild type, ΔL: deletion  
621 mutant ΔBCAL3494, ΔM: deletion mutant ΔBCAM0992)

622

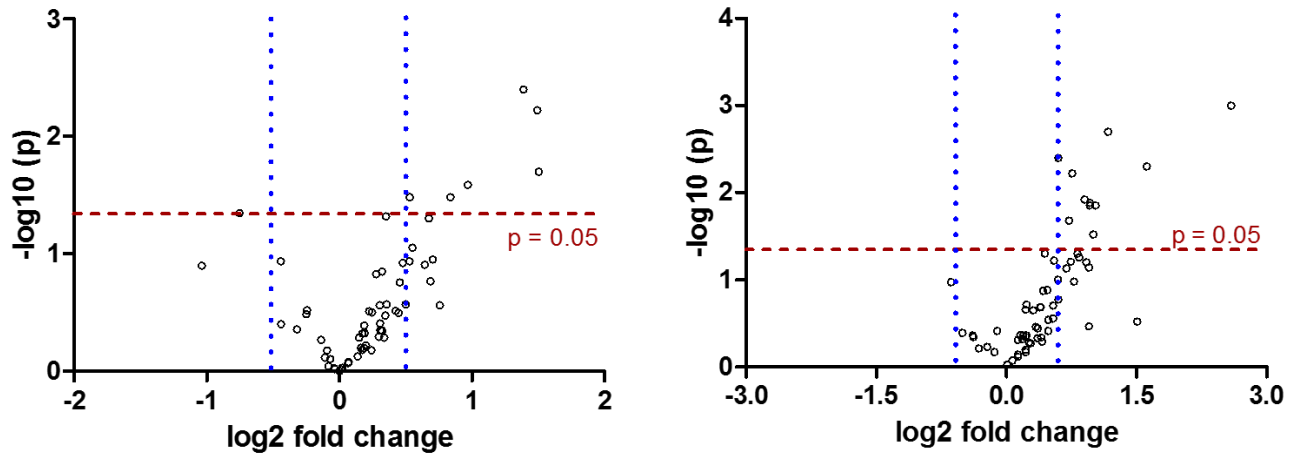

623

624 **FIGURE S5** Differential expression (Volcano plots) of all genes with methylated  
625 promoter region in J2315 (left) and K56-2 (right) for which expression was quantified  
626 using qPCR. Cut-offs were drawn at fold changes -1.5 and 1.5 (blue) and at p-value  
627 0.05 (red). All genes outside of these cut-offs were considered significantly up- or  
628 downregulated.



629

630

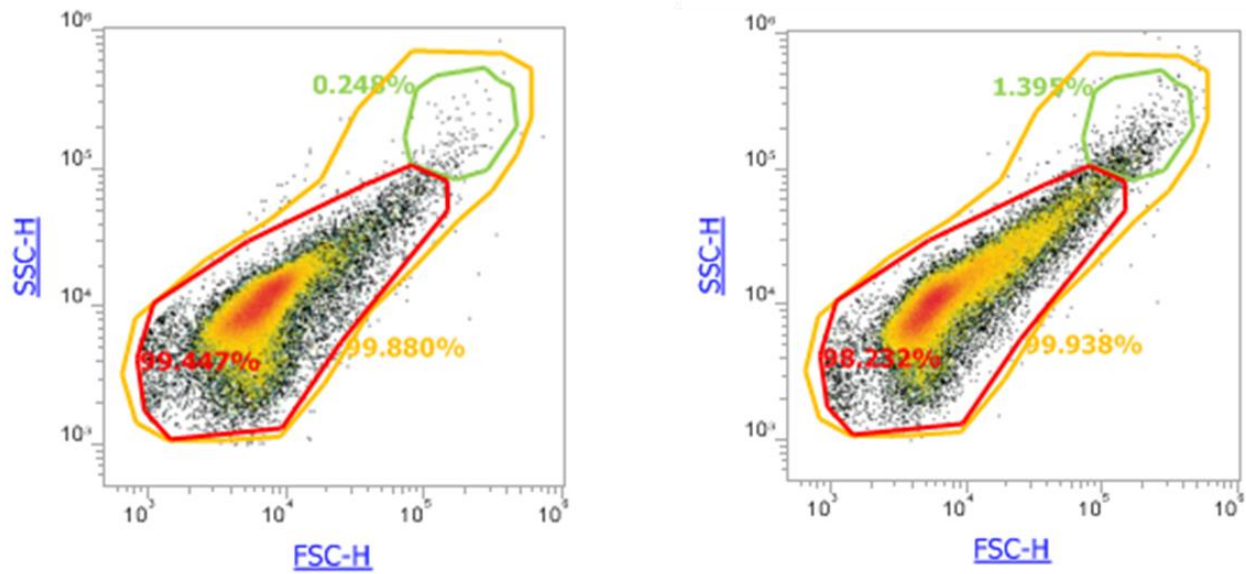

631

632 **FIGURE S6** Quantification of the number of clusters in wild type J2315 (left) and  
633  $\Delta$ BCAL3494 J2315 (right) (SSC: side scatter, FSC: forward scatter, green circle  
634 indicates clusters, red circle indicates main population (ranging from approx.  $10^3$  to  $10^5$   
635 for both FSC and SSC)).

636

637 **TABLE S1** All DNA MTase genes in the *B. cenocepacia* J2315 genome identified by  
 638 REBASE (\* BLASTn search against the genus *Burkholderia*, default screening  
 639 parameters were used).

| Locus Tag       | Name       | Location | Predicted type MTase (48) | Widely distributed in genus <i>Burkholderia</i> * |
|-----------------|------------|----------|---------------------------|---------------------------------------------------|
| <b>BCAL3494</b> | M.BceJI    | CHR 1    | Type III                  | ✓                                                 |
| <b>BCAM1036</b> | M.BceJII   | CHR 2    |                           |                                                   |
| <b>pBCA072</b>  | M.BceJIII  | PLASMID  |                           |                                                   |
| <b>BCAM0992</b> | M.BceJIV   | CHR 2    |                           | ✓                                                 |
| <b>BCAL0178</b> | M.BceJ178P | CHR 1    | Type II                   |                                                   |
| <b>BCAL0414</b> | M.BceJ414P | CHR 1    | Type I                    |                                                   |

640

641 **TABLE S2** Methylation motifs in *B. cenocepacia* (methylated bases in bold and  
 642 underlined, 6mA: N<sub>6</sub>-methyl adenine, 4mC: N<sub>4</sub>-methyl cytosine, F: forward strand, R:  
 643 reverse strand). \* wild type strain J2315 percentages.

| Motif                              | Methylation | Strand | Called modified motifs * (%) | Methylation of motif by |
|------------------------------------|-------------|--------|------------------------------|-------------------------|
| CAC <b><u>AG</u></b>               | 6mA         | F      | 6834/6836 (99.9)             | BCAL3494                |
| <b><u>GT</u>WW<b><u>AC</u></b></b> | 6mA         | F+R    | 961/982 (97.8)               | BCAM0992                |
| GCG <b><u>G</u></b> CCGC           | 4mC         | F+R    | 1738/6850 (25.3)             | unknown                 |

644

645 **TABLE S3** Genes with methylated promoter region (CACAG motif) in J2315  
 646 (methylated promoter regions in K56-2 are indicated with '+', non-methylated promoter  
 647 regions with '-').

| Locus tag                      | Gene function                                                                                              | Methylated in K56-2 |
|--------------------------------|------------------------------------------------------------------------------------------------------------|---------------------|
| <b>Intermediary metabolism</b> |                                                                                                            |                     |
| <b>1</b>                       | BCAL0627 putative hydrolase                                                                                | +                   |
| <b>2</b>                       | BCAL1059 ArgD bifunctional N-succinyldiaminopimelate-aminotransferase/acetylornithine transaminase protein | +                   |
| <b>3</b>                       | BCAL1086 putative lipoprotein                                                                              | +                   |
| <b>4</b>                       | BCAL1249 putative PHB depolymerase                                                                         | +                   |
| <b>5</b>                       | BCAL1515 SucA 2-oxoglutarate dehydrogenase E1 component                                                    | +                   |
| <b>6</b>                       | BCAL1762 acetyltransferase (GNAT) family protein                                                           | +                   |
| <b>7</b>                       | BCAL1796 putative saccharopine dehydrogenase                                                               | +                   |
| <b>8</b>                       | BCAL1924 MoeA3 molybdopterin biosynthesis protein                                                          | +                   |
| <b>9</b>                       | BCAL2767 ArgF ornithine carbamoyltransferase                                                               | +                   |
| <b>10</b>                      | BCAL2782 PdxH pyridoxamine 5'-phosphate oxidase                                                            | +                   |
| <b>11</b>                      | BCAL2796 benzoylformate decarboxylase                                                                      | +                   |
| <b>12</b>                      | BCAM0941 <i>gnd</i> 6-phosphogluconate dehydrogenase                                                       | +                   |

|                               |          |                                                               |   |
|-------------------------------|----------|---------------------------------------------------------------|---|
| <b>13</b>                     | BCAM1128 | putative glycosyl transferase family protein                  | + |
| <b>14</b>                     | BCAM1204 | DadX alanine racemase                                         | + |
| <b>15</b>                     | BCAM1262 | IlvD dihydroxy-acid dehydratase                               | + |
| <b>16</b>                     | BCAM1353 | <i>ald</i> alanine dehydrogenase                              | + |
| <b>17</b>                     | BCAM1459 | AtoE short-chain fatty acid transporter                       | + |
| <b>18</b>                     | BCAM1485 | ornithine cyclodeaminase                                      | + |
| <b>19</b>                     | BCAM2380 | putative D-isomer specific 2-hydroxyacid dehydrogenase        | + |
| <b>20</b>                     | BCAM2738 | IspH 4-hydroxy-3-methylbut-2-enyl diphosphate reductase       | + |
| <b>21</b>                     | BCAS0223 | AfcC putative fatty acid desaturase                           | + |
| <b>22</b>                     | BCAS0257 | putative acetyltransferase                                    | + |
| <b>23</b>                     | BCAS0324 | sugar ABC transporter ATP-binding protein                     | + |
| <b>Regulation</b>             |          |                                                               |   |
| <b>1</b>                      | BCAL0003 | MarR family regulatory protein                                | + |
| <b>2</b>                      | BCAL0003 | MarR family regulatory protein                                | + |
| <b>3</b>                      | BCAL1457 | LysR family regulatory protein                                | + |
| <b>4</b>                      | BCAL1477 | LysR family regulatory protein                                | + |
| <b>5</b>                      | BCAL2443 | GntR family regulatory protein                                | + |
| <b>6</b>                      | BCAL2465 | TetR family regulatory protein                                | + |
| <b>7</b>                      | BCAL2465 | TetR family regulatory protein                                | + |
| <b>8</b>                      | BCAL3190 | IciR family regulatory protein                                | + |
| <b>9</b>                      | BCAM0466 | LysR family regulatory protein                                | + |
| <b>10</b>                     | BCAM0466 | LysR family regulatory protein                                | + |
| <b>11</b>                     | BCAM0618 | two-component regulatory system response regulator protein    | + |
| <b>12</b>                     | BCAM0820 | hybrid two-component system kinase-response regulator protein | + |
| <b>13</b>                     | BCAM0886 | LysR family regulatory protein                                | + |
| <b>14</b>                     | BCAM1415 | AraC family regulatory protein                                | + |
| <b>15</b>                     | BCAM1755 | GntR family regulatory protein                                | + |
| <b>16</b>                     | BCAM1975 | AraC family regulatory protein                                | + |
| <b>17</b>                     | BCAS0235 | two-component regulatory system, response regulator protein   | + |
| <b>Membrane and transport</b> |          |                                                               |   |
| <b>1</b>                      | BCAL2005 | putative membrane protein                                     | + |
| <b>2</b>                      | BCAL2648 | putative outer membrane protein                               | + |
| <b>3</b>                      | BCAL2648 | putative outer membrane protein                               | + |
| <b>4</b>                      | BCAL2677 | putative permease protein                                     | + |
| <b>5</b>                      | BCAL2948 | putative membrane protein                                     | + |
| <b>6</b>                      | BCAL3490 | putative exported protein                                     | + |
| <b>7</b>                      | BCAM0837 | putative membrane protein                                     | + |
| <b>8</b>                      | BCAM0837 | putative membrane protein                                     | + |
| <b>9</b>                      | BCAM0945 | putative membrane protein                                     | + |
| <b>10</b>                     | BCAM1797 | putative ion channel protein                                  | + |
| <b>11</b>                     | BCAM2683 | putative cation-transporting ATPase membrane protein          | + |

| <b>Protein synthesis</b>                     |           |                                                                  |   |
|----------------------------------------------|-----------|------------------------------------------------------------------|---|
| <b>1</b>                                     | BCAL0024  | GidA tRNA uridine 5-carboxymethylaminomethyl modification enzyme | + |
| <b>2</b>                                     | BCAL0115  | RpsU 30S ribosomal protein S21                                   | + |
| <b>3</b>                                     | BCAL0115  | RpsU 30S ribosomal protein S21                                   | + |
| <b>4</b>                                     | BCAL0423a | RpmH 50S ribosomal protein L34                                   | + |
| <b>5</b>                                     | BCAL0990  | RpmF 50S ribosomal protein L32                                   | + |
| <b>6</b>                                     | BCAL1553  | putative ribonuclease                                            | + |
| <b>7</b>                                     | BCAL2880  | RpmF 50S ribosomal protein L32                                   | + |
| <b>8</b>                                     | BCAL3303  | queA S-adenosylmethionine:tRNA ribosyltransferase-isomerase      | + |
| <b>9</b>                                     | BCAL3530  | HupA DNA-binding protein HU-alpha                                | + |
| <b>10</b>                                    | BCAM0131  | HchA chaperone protein                                           | + |
| <b>11</b>                                    | BCAM0158  | putative diguanylate phosphodiesterase                           | + |
| <b>Electron transport and ATP synthesis</b>  |           |                                                                  |   |
| <b>1</b>                                     | BCAL0194  | putative oxidoreductase                                          | + |
| <b>2</b>                                     | BCAL0389  | DsbC thiol:disulfide interchange protein                         | + |
| <b>3</b>                                     | BCAL0626  | putative 2-nitropropane dioxygenase                              | + |
| <b>4</b>                                     | BCAL3276  | PpnK NAD(+)/NADH kinase family protein                           | + |
| <b>5</b>                                     | BCAL3475  | putative molybdopterin-containing oxidoreductase                 | + |
| <b>Chromosome replication</b>                |           |                                                                  |   |
| <b>1</b>                                     | BCAL0423  | DnaA chromosomal replication initiation protein                  | + |
| <b>2</b>                                     | BCAL0423  | DnaA chromosomal replication initiation protein                  | + |
| <b>Proteins involved in DNA methylation</b>  |           |                                                                  |   |
| <b>1</b>                                     | BCAL0509  | MetK S-adenosylmethionine synthetase                             | + |
| <b>Hypothetical proteins and pseudogenes</b> |           |                                                                  |   |
| <b>1</b>                                     | BCAL0362  | conserved hypothetical protein                                   | + |
| <b>2</b>                                     | BCAL0610  | conserved hypothetical protein                                   | + |
| <b>3</b>                                     | BCAL0761  | conserved hypothetical protein                                   | + |
| <b>4</b>                                     | BCAL0763  | conserved exported protein                                       | + |
| <b>5</b>                                     | BCAL0768  | conserved hypothetical protein                                   | + |
| <b>6</b>                                     | BCAL0794  | conserved hypothetical protein                                   | + |
| <b>7</b>                                     | BCAL0810  | pseudogene                                                       | + |
| <b>8</b>                                     | BCAL3259  | pseudogene                                                       | + |
| <b>9</b>                                     | BCAL3259  | pseudogene                                                       | - |
| <b>10</b>                                    | BCAL3483  | hypothetical protein                                             | + |
| <b>11</b>                                    | BCAM0295  | conserved hypothetical protein                                   | + |
| <b>12</b>                                    | BCAM0397  | conserved hypothetical protein                                   | + |
| <b>13</b>                                    | BCAM0488  | conserved hypothetical protein                                   | + |
| <b>14</b>                                    | BCAM0888  | conserved hypothetical protein                                   | + |
| <b>15</b>                                    | BCAM2073  | hypothetical protein                                             | + |
| <b>16</b>                                    | BCAM2254  | hypothetical protein                                             | + |
| <b>17</b>                                    | BCAM2287  | hypothetical protein                                             | + |

|           |          |                                |   |
|-----------|----------|--------------------------------|---|
| <b>18</b> | BCAM2417 | conserved hypothetical protein | + |
| <b>19</b> | BCAM2609 | hypothetical protein           | + |
| <b>20</b> | BCAM2635 | hypothetical protein           | + |
| <b>21</b> | BCAS0773 | hypothetical protein           | + |

648

649 **TABLE S4** Genes with methylated promoter region (GTWWAC motif) in J2315  
 650 (methylated promoter regions in K56-2 are indicated with '+', non-methylated promoter  
 651 regions with '-').

|                                | <b>Locus tag</b> | <b>Gene function</b>                                | <b>Methylated in K56-2</b> |
|--------------------------------|------------------|-----------------------------------------------------|----------------------------|
| <b>Intermediary metabolism</b> |                  |                                                     |                            |
| <b>1</b>                       | BCAL0064         | AcoD acetaldehyde dehydrogenase                     | +                          |
| <b>2</b>                       | BCAL0162         | GmhA phosphoheptose isomerase                       | +                          |
| <b>3</b>                       | BCAL0508         | LpxL lipid A biosynthesis myristoyl acyltransferase | +                          |
| <b>4</b>                       | BCAL0709         | LipB lipoate-protein ligase B                       | +                          |
| <b>5</b>                       | BCAL0995         | AcpP acyl carrier protein                           | +                          |
| <b>6</b>                       | BCAL1290         | undecaprenyl pyrophosphate phosphatase              | +                          |
| <b>7</b>                       | BCAL1467         | AroC chorismate synthase                            | +                          |
| <b>8</b>                       | BCAL1478         | putative hydrolase                                  | +                          |
| <b>9</b>                       | BCAL1556         | RpiA ribose-5-phosphate isomerase A                 | +                          |
| <b>10</b>                      | BCAL1938         | family C40 cysteine peptidase                       | +                          |
| <b>11</b>                      | BCAL2406         | WabR putative glycosyltransferase                   | +                          |
| <b>12</b>                      | BCAL2419         | glycosyl hydrolases family protein                  | +                          |
| <b>13</b>                      | BCAL2701         | ArgD acetylornithine transaminase protein           | +                          |
| <b>14</b>                      | BCAL2875         | AcpP acyl carrier protein                           | +                          |
| <b>15</b>                      | BCAL2942         | CysM cysteine synthase B                            | +                          |
| <b>16</b>                      | BCAL3153         | putative lipoprotein                                | +                          |
| <b>17</b>                      | BCAL3179         | LdhA putative D-lactate dehydrogenase               | +                          |
| <b>18</b>                      | BCAM0013         | putative acetyltransferase                          | +                          |
| <b>19</b>                      | BCAM1679         | putative lysylphosphatidylglycerol synthetase       | +                          |
| <b>20</b>                      | BCAM1761         | putative lipoprotein                                | +                          |
| <b>21</b>                      | BCAM2511         | GarD putative D-galactarate dehydratase             | +                          |
| <b>22</b>                      | BCAM2737         | putative glycosyl transferase                       | +                          |
| <b>23</b>                      | BCAS0065         | putative glutathione S-transferase                  | +                          |
| <b>Membrane and transport</b>  |                  |                                                     |                            |
| <b>1</b>                       | BCAL0121         | AqpZ aquaporin Z                                    | +                          |
| <b>2</b>                       | BCAL0126         | MotA chemotaxis protein                             | +                          |
| <b>3</b>                       | BCAL0824         | putative membrane protein                           | +                          |
| <b>4</b>                       | BCAL1525         | <i>flp</i> type pilus subunit                       | +                          |
| <b>5</b>                       | BCAL1808         | putative membrane protein                           | +                          |
| <b>6</b>                       | BCAL2301         | putative exported protein                           | +                          |

|                                             |           |                                                             |   |
|---------------------------------------------|-----------|-------------------------------------------------------------|---|
| <b>7</b>                                    | BCAL2370  | putative membrane protein                                   | + |
| <b>8</b>                                    | BCAM0837  | putative membrane protein                                   | + |
| <b>9</b>                                    | BCAM0885  | putative membrane protein                                   | + |
| <b>10</b>                                   | BCAM0988  | putative exported protein                                   | + |
| <b>11</b>                                   | BCAM1669  | putative exported protein                                   | + |
| <b>12</b>                                   | BCAM1726  | putative exported protein                                   | + |
| <b>13</b>                                   | BCAM1743  | periplasmic solute-binding protein                          | + |
| <b>14</b>                                   | BCAM1830  | putative exported protein                                   | + |
| <b>15</b>                                   | BCAM2555  | putative exported protein                                   | + |
| <b>16</b>                                   | BCAM2827  | putative exported protein                                   | + |
| <b>17</b>                                   | BCAM2828  | putative membrane protein                                   | + |
| <b>Regulation</b>                           |           |                                                             |   |
| <b>1</b>                                    | BCAL0054  | MerR family regulatory protein                              | + |
| <b>2</b>                                    | BCAL0444  | GntR family regulatory protein                              | + |
| <b>3</b>                                    | BCAL0497  | two-component regulatory system, sensor kinase protein      | + |
| <b>4</b>                                    | BCAL2606  | two-component regulatory system, response regulator protein | + |
| <b>5</b>                                    | BCAM0076  | TetR family regulatory protein                              | + |
| <b>6</b>                                    | BCAM0085  | TetR family regulatory protein                              | + |
| <b>7</b>                                    | BCAM0483  | ADA-like AraC family regulatory protein                     | + |
| <b>8</b>                                    | BCAM2589  | IcIR family regulatory protein                              | + |
| <b>9</b>                                    | BCAS0007  | TetR family regulatory protein                              | + |
| <b>10</b>                                   | BCAS0258  | GntR family regulatory protein                              | + |
| <b>Electron transport and ATP synthesis</b> |           |                                                             |   |
| <b>1</b>                                    | BCAL0080  | putative cytochrome                                         | + |
| <b>2</b>                                    | BCAL2145  | NADH-ubiquinone oxidoreductase subunit                      | + |
| <b>3</b>                                    | BCAL2415  | PurT phosphoribosylglycinamide formyltransferase 2          | + |
| <b>4</b>                                    | BCAL3187  | putative oxidoreductase                                     | + |
| <b>5</b>                                    | BCAL3362  | putative oxidoreductase                                     | + |
| <b>6</b>                                    | BCAL3432  | cytochrome c assembly protein                               | + |
| <b>DNA transposition</b>                    |           |                                                             |   |
| <b>1</b>                                    | BCAL2216  | putative transposase                                        | + |
| <b>2</b>                                    | BCAL3238  | putative transposase                                        | + |
| <b>3</b>                                    | BCAL3295  | putative transposase                                        | + |
| <b>Protein synthesis</b>                    |           |                                                             |   |
| <b>1</b>                                    | BCAL1856  | RimO ribosomal protein S12 methylthiotransferase            | + |
| <b>2</b>                                    | BCALr3484 | tRNA-Val                                                    | + |
| <b>Chromosome replication</b>               |           |                                                             |   |
| <b>1</b>                                    | BCAL0079  | <i>rep</i> ATP-dependent DNA helicase                       | + |
| <b>Proteins involved in DNA methylation</b> |           |                                                             |   |
| <b>1</b>                                    | BCAL0747  | putative methyltransferase                                  | + |
| <b>Other proteins</b>                       |           |                                                             |   |

|                                              |            |                                                  |   |
|----------------------------------------------|------------|--------------------------------------------------|---|
| <b>1</b>                                     | BCAL0825   | UvrA excinuclease ABC subunit A                  | + |
| <b>2</b>                                     | BCAL0849   | subfamily M48B metallopeptidase                  | + |
| <b>3</b>                                     | BCAL2643   | SodC superoxide dismutase                        | + |
| <b>4</b>                                     | BCAL2749   | putative diguanylate phosphodiesterase           | + |
| <b>5</b>                                     | BCAL2940   | putative histone deacetylase-family protein      | + |
| <b>6</b>                                     | BCAM1362   | putative penicillin-binding protein              | + |
| <b>7</b>                                     | BCAS0010   | putative activator of osmoprotectant transporter | + |
| <b>8</b>                                     | BCAS0293   | AidA nematocidal protein                         | + |
| <b>Hypothetical proteins and pseudogenes</b> |            |                                                  |   |
| <b>1</b>                                     | BCAL0362   | conserved hypothetical protein                   | + |
| <b>2</b>                                     | BCAL0434   | putative exported protein                        | + |
| <b>3</b>                                     | BCAL1442   | conserved hypothetical protein                   | + |
| <b>4</b>                                     | BCAL2175   | conserved hypothetical protein                   | + |
| <b>5</b>                                     | BCAL3193   | conserved hypothetical protein                   | + |
| <b>6</b>                                     | BCAM0008   | conserved hypothetical protein                   | + |
| <b>7</b>                                     | BCAM1874-2 | pseudo                                           | + |
| <b>8</b>                                     | BCAM2207   | conserved hypothetical protein                   | + |
| <b>9</b>                                     | BCAM2289   | conserved hypothetical protein                   | + |

652

653 **TABLE S5** List of TFs that bind to methylation motifs CACAG and GTWWAC, predicted  
 654 by Virtual Footprint. Bold sequences represent methylation motifs. (Consensus  
 655 sequence based on TF binding in *E. coli* K12)

| Transcription Factor | Strand | Score | Consensus sequence         |
|----------------------|--------|-------|----------------------------|
| <b>CACAG motif</b>   |        |       |                            |
| GlpR                 | -      | 6.07  | <b>TGTGTTCTAATTCATTTAG</b> |
| <b>GTWWAC motif</b>  |        |       |                            |
| ArcA                 | +      | 7.39  | <b>TGTTAACATG</b>          |
| ArcA                 | -      | 7.22  | <b>TGTTAACACG</b>          |
| OxyR                 | -      | 4.49  | <b>CATGTTAACAC</b>         |
| OxyR                 | +      | 4.11  | <b>CGTGTTAACAT</b>         |
| Fis                  | -      | 3.49  | <b>GACGCGCATGTTAAC</b>     |
| Fur                  | -      | 2.55  | <b>ATGTTAAC</b>            |

656

657 **TABLE S6** Overview of all primers used for construction and complementation of gene  
 658 deletion mutants.

| Primers                   | Sequence (5' 3')                | Abbreviation |
|---------------------------|---------------------------------|--------------|
| <b>ΔBCAL3494 primers</b>  |                                 |              |
| <b>Flanking sequences</b> |                                 |              |
| upstream sequence F       | ATATGAATTCCTCAACGGTTTCAAGGAGACG | UL3494-EcoRI |

|                                       |                                   |                  |
|---------------------------------------|-----------------------------------|------------------|
| upstream sequence R                   | ATATAGATCTGGCGGATCGATGTAGACGAG    | UL3494-Bgl II    |
| downstream sequence F                 | ATATAGATCTGGGATGCAAGAAGGCTCATC    | DL3494-Bgl II    |
| downstream sequence R                 | TTTACCCGGGATAGGTCTCGCGCTGGTGTC    | DL3494-SmaI      |
| <b>Control primers</b>                |                                   |                  |
| Overlapping sequence insert control F | ATGGAGAATCCCGGAAGAAG              | joinL3494-F      |
| Overlapping sequence insert control R | TGCTGTTTCATCTGGTGCTC              | joinL3494-R      |
| BCAL3494 gene control F               | GGCAGCGATTTTCGTCTATCC             | geneL3494-F      |
| BCAL3494 gene control R               | CACTTCGTGCTCGTCGATGT              | geneL3494-R      |
| <b>Complementation</b>                |                                   |                  |
| BCAL3494 complementation F            | TTTGGATCCTCGCTCTGTTTCAGCCTTTGAGC  | L3493-4-ov-BamHI |
| BCAL3494 complementation R            | TTTTCTAGAGCTTTCACGCGAATGACAGGATG  | L3493-4-ov-XbaI  |
| <b>ΔBCAM0992 primers</b>              |                                   |                  |
| <b>Flanking sequences</b>             |                                   |                  |
| upstream sequence F                   | ATATGAATTCGATCTACCTGAAGCGCGAAG    | UM0992-EcoRI     |
| upstream sequence R                   | ATATGCTAGCGGCTCTTCGATCAGGTCACG    | UM0992-NheI      |
| downstream sequence F                 | ATATGCTAGCCGTATGAGACCGGAGCAAGC    | DM0992-NheI      |
| downstream sequence R                 | ATATAGATCTCACTTGACCCACAGGCCTTC    | DM0992-Bgl II    |
| <b>Control primers</b>                |                                   |                  |
| Overlapping sequence insert control F | ATACCTCGGTGCAGCTGATC              | joinM0992-F      |
| Overlapping sequence insert control R | CAATGCTCGAAACATCCAGA              | joinM0992-R      |
| BCAM0992 gene control F               | AACGATTCGGACAAGCGTTC              | geneM0992-F      |
| BCAM0992 gene control R               | CGGTCCCAGATGATCTCGTT              | geneM0992-R      |
| <b>Complementation</b>                |                                   |                  |
| BCAM0992 complementation F            | AATAATAATCATATGCGTGACCTGATCGAAGAG | M0992-ov-NdeI    |
| BCAM0992 complementation R            | TTTGGATCCCATACGATGTATGCGTTGCGTTC  | M0992-ov-BamHI   |
| <b>pGPI-Scel-XCm MCS primers</b>      |                                   |                  |
| MCS plasmid sequence insert control F | AACAAGCCAGGGATGTAACG              | MCS-B-F          |
| MCS plasmid sequence insert control R | TGTTCCGGCCAGATAGAAACC             | MCS-B-R          |

659

660 **TABLE S7** Primers used in qPCR experiments.

| Primers        | Sequence (5' 3')      | Primers        | Sequence (5' 3')       |
|----------------|-----------------------|----------------|------------------------|
| <b>M0918-F</b> | GAGATGAGCACCGATCACAC  | <b>L0024-F</b> | TACAGGCGTGATCGAAGGTG   |
| <b>M0918-R</b> | CCTTCGAGGAACGACTTCAG  | <b>L0024-R</b> | GGAAGATCTGGTGCGATTCC   |
| <b>L0003-F</b> | AATGGCCTGAATTCCTGACG  | <b>L0509-F</b> | GGTGATGGTCAACACGTTCCG  |
| <b>L0003-R</b> | GTGATGCACGGTCTTCTTCG  | <b>L0509-R</b> | CCGTAAGCTGCCGTCTTCTC   |
| <b>L0423-F</b> | AGCTGGACTGGGTCAAGAGC  | <b>L2465-F</b> | GGCTGTCTGATCGTGCTGTC   |
| <b>L0423-R</b> | GGATCGAGGACGAACTGGAC  | <b>L2465-R</b> | ATGCCCTGTTGAACCGTCAC   |
| <b>M0820-F</b> | ACGTCTACCGGACCGAACAC  | <b>L2767-F</b> | AGACCTATCACCCGCTGCAC   |
| <b>M0820-R</b> | TCGAGCACGATTTCTGTTGAG | <b>L2767-R</b> | ACGGGTGGTATTCTGTTCTGTC |



|                |                       |                |                       |
|----------------|-----------------------|----------------|-----------------------|
| <b>L1059-F</b> | GATGCTGACGACGAACGAAC  | <b>L2782-F</b> | AGCCGAACACGATGACACTC  |
| <b>L1059-R</b> | GTCCTTGAAGATGCCGAAGC  | <b>L2782-R</b> | CTTGCGGCTTTCGTAATTGG  |
| <b>L1457-F</b> | CAGCAGATGAATTCGACCAC  | <b>L3303-F</b> | GACGAGACGCGCTACCAGAC  |
| <b>L1457-R</b> | TCGACGTAAGCGAGGATCTG  | <b>L3303-R</b> | GGTCGTACCACTCGCTGTGC  |
| <b>S0223-F</b> | ATGCTCGTGTCTTTTCATGC  | <b>L0054-F</b> | AGCGCACCGATTTCGAAGTAC |
| <b>S0223-R</b> | ACTGGTCGCCGTAGTCGAAG  | <b>L0054-R</b> | ACGTGTCCGATGTGATCGTC  |
| <b>M2738-F</b> | GCTGAGCGAACAGGTTGACG  | <b>L0162-F</b> | GCATCCACGAAGTCCATCTG  |
| <b>M2738-R</b> | ACCATTGCGCCTTCACTTCC  | <b>L0162-R</b> | AATCCTCACCCAGCAGCATC  |
| <b>M1262-F</b> | ACCGCGAACTCGATGAACTG  | <b>L1556-F</b> | ACTGCTTCATCGACGCACTC  |
| <b>M1262-R</b> | GGTGCAGGATCGTGTGGTC   | <b>L1556-R</b> | CGTTCAGGTCGAACACCTTG  |
| <b>L0079-F</b> | GTCAACCAGCTCACCGTCTG  | <b>L2415-F</b> | GTGAAGCCCGTGATGTCTGC  |
| <b>L0079-R</b> | CTTCCACAGCGAGATGATGC  | <b>L2415-R</b> | GACCGGCTCGCAGAAGTAGG  |
| <b>L0126-F</b> | TGATGGCGCTTCTTTACGTG  | <b>S0258-F</b> | AAGATGCGGGAAGTATCGAC  |
| <b>L0126-R</b> | ATTCGACGATGTGGTGATCG  | <b>S0258-R</b> | ATGAAACACCCAGCCGATACG |
| <b>L0508-F</b> | TCGTCTGAGGGTGTTCGAAGC | <b>M0941-F</b> | ACAAGCAATCGGTGTGATCG  |
| <b>L0508-R</b> | ATCAGCGGAATCTGCTCCTC  | <b>M0941-R</b> | AGCGTATAGGTCGGCACCAG  |
| <b>L0709-F</b> | GCGGCGTATAATCTCGCTTC  | <b>M1415-F</b> | AGACGACAACGCGAAACTCG  |
| <b>L0709-R</b> | ATGTCGACGGTTTCCAGTCC  | <b>M1415-R</b> | ATCAGGTACGACGGCGACAG  |
| <b>L2701-F</b> | TCACGTTGACACAGCTTC    | <b>M0076-F</b> | TGCCGCCTTTGTAATCATGG  |
| <b>L2701-R</b> | GACGCGATGTTGTTGAGCTC  | <b>M0076-R</b> | GCGACACGAAATGATCTCG   |
| <b>L2942-F</b> | AAGCCTACATGCCGACCATC  | <b>M1362-F</b> | GATCGTGGTCGTCGTGTTCC  |
| <b>L2942-R</b> | GATCGCAGACGATGAACACG  | <b>M1362-R</b> | GTCTTGTCTGTTGCCGAGACG |
| <b>L2406-F</b> | TGCCGAGATTGCTGTTCAAG  | <b>L1515-F</b> | CGCAAGCAACCTGTACTTCG  |
| <b>L2406-R</b> | AGCAACGGTGTGACGAACAG  | <b>L1515-R</b> | GTCAGGCGATTGAGGATGTG  |

661

662 **TABLE S8** List of primers used for construction of translational eGFP reporter fusion  
663 plasmids.

| <b>Gene</b>           | <b>Primers</b>     | <b>Sequence (5' 3')</b>         |
|-----------------------|--------------------|---------------------------------|
| <b>BCAL0079</b>       | F-eGFP-L0079-BamHI | ATATGGATCCTGCGTATTGTGTCCGATCA   |
|                       | R-eGFP-L0079-EcoRI | ATATGAATTCATGATGGCGGATGGTGT     |
| <b>BCAL1515</b>       | F-eGFP-L1515-BamHI | ATATGGATCCGGTGCTTTCAGGCACATTC   |
|                       | R-eGFP-L1515-EcoRI | ATATGAATTCGCCGAACAGATAGGAGTTGAG |
| <b>BCAM0820</b>       | F-eGFP-M0820-BamHI | ATATGGATCCCTGCCGATTCGGAGTATCTG  |
|                       | R-eGFP-M0820-EcoRI | ATATGAATTCATCCGAGGCATTATCACTGCT |
| <b>Plasmid insert</b> | F-pJH2             | CGTAGAGGATCTGCTCATGTTTGC        |
|                       | R-pJH2             | GACGTAACGGCCACAAGTTCA           |

664

## 665 **References**

- 666 1. Mahenthiralingam E, Urban TA, Goldberg JB. 2005. The multifarious,  
667 multireplicon *Burkholderia cepacia* complex. Nat Rev Microbiol 3:144–56.
- 668 2. Coenye T. 2010. Social interactions in the *Burkholderia cepacia* complex: biofilm  
669 formation and quorum sensing. Future Microbiol 5:1087–99.
- 670 3. Mahenthiralingam E, Vandamme P. 2005. Taxonomy and pathogenesis of the  
671 *Burkholderia cepacia* complex. Chron Respir Dis 2:209–17.
- 672 4. Lipuma JJ. 2010. The Changing Microbial Epidemiology in Cystic Fibrosis. Clin  
673 Microbiol Rev 23:299–323.
- 674 5. Sousa SA, Feliciano JR, Pita T, Guerreiro SI, Leitão JH. 2017. *Burkholderia*  
675 *cepacia* Complex Regulation of Virulence Gene Expression : A Review. Genes  
676 19:8(1).
- 677 6. Drevinek P, Mahenthiralingam E. 2010. *Burkholderia cenocepacia* in cystic  
678 fibrosis : epidemiology and molecular mechanisms of virulence. Clin Microbiol  
679 Infect 16(7):821–30.
- 680 7. Coutinho CP. 2011. Long-term colonization of the cystic fibrosis lung by  
681 *Burkholderia cepacia* complex bacteria: epidemiology, clonal variation, and  
682 genome-wide expression alterations. Front Cell Infect Microbiol 1(12):1–11.
- 683 8. Courtney JM, Dunbar KEA, Mcdowell A, Moore JE, Warke TJ. 2004. Clinical  
684 outcome of *Burkholderia cepacia* complex infection in cystic fibrosis adults. J Cyst  
685 Fibros 3:93–8.
- 686 9. Hindo H, Sigley C, Karlson K. 2008. Case Report Cepacia Syndrome in an

- 687 Adolescent With Cystic Fibrosis. *Infectious Diseases in Clinical Practice*  
688 16(3):198–200.
- 689 10. Holden MTG, Seth-smith HMB, Crossman LC, Sebahia M, Bentley SD, Cerden  
690 AM, et al. 2009. The Genome of *Burkholderia cenocepacia* J2315 , an Epidemic  
691 Pathogen of Cystic Fibrosis Patients. *J Bacteriol* 191(1):261–77.
- 692 11. Coenye T, LiPuma JJ. 2003. Population structure analysis of *Burkholderia*  
693 *cepacia* genomovar III: Varying degrees of genetic recombination characterize  
694 major clonal complexes. *Microbiology* 149(1):77–88.
- 695 12. Vandamme P, Holmes B, Coenye T, Goris J, Mahenthiralingam E, LiPuma JJ,  
696 Govan JR. 2003. *Burkholderia cenocepacia* sp. nov. - A new twist to an old story.  
697 *Res Microbiol* 154(2):91–6.
- 698 13. Weinhold B. 2006. Epigenetics: the science of change. *Environ Heal Perspect*  
699 114(3):160–7.
- 700 14. Sánchez-Romero MA, Cota I, Casadesús J. 2015. DNA methylation in bacteria :  
701 from the methyl group to the methylome. *Curr Opin Microbiol* 25:9–16.
- 702 15. Sánchez-Romero MA, Casadesús J. 2020. The bacterial epigenome. *Nat Rev*  
703 *Microbiol* 18(1):7-20.
- 704 16. Blow MJ, Clark TA, Daum CG, Deutschbauer AM, Fomenkov A, Fries R, et al.  
705 2016. The Epigenomic Landscape of Prokaryotes. *PLoS Genet* 12(2):1–28.
- 706 17. Casadesús J, Low D. 2006. Epigenetic Gene Regulation in the Bacterial World.  
707 *Microbiol Mol Biol Rev* 70(3):830–56.
- 708 18. Lacey L. Westphal, Peter Sauvey, Matthew M. Champion, Ian M. Ehrenreich,  
709 Steven E. Finkel. 2016. Genomewide Dam Methylation in Stationary Phase.

- 710 mSystems 1(6):1–13.
- 711 19. Attwood JT, Yung RL, Richardson BC. 2002. DNA methylation and the regulation  
712 of gene transcription. *Cell Mol Life Sci* 59:241–57.
- 713 20. Low DA, Casadesús J. 2008. Clocks and switches: bacterial gene regulation by  
714 DNA adenine methylation. *Curr Opin Microbiol* 11(2):106–12.
- 715 21. Adhikari S, Curtis PD. 2016. DNA methyltransferases and epigenetic regulation in  
716 bacteria. *FEMS Microbiol Rev* 40(5):575-91.
- 717 22. Wion D, Casadesús J. 2006. N6-methyl-adenine: an epigenetic signal for DNA–  
718 protein interactions. *Nat Rev Microbiol* 4(3):183–92.
- 719 23. Militello KT, Mandarano AH, Varchtchouk O, Simon RD. 2014. Cytosine DNA  
720 methylation influences drug resistance in *Escherichia coli* through increased sugE  
721 expression. *FEMS Microbiol Lett* 350:100–6.
- 722 24. Hermann A, Jeltsch A. 2003. Methylation Sensitivity of Restriction Enzymes  
723 Interacting with GATC Sites. *Biotechniques* 34(5):30–3.
- 724 25. Flusberg BA, Webster D, Lee J, Travers K, Olivares E, Clark A, et al. 2010. Direct  
725 detection of DNA methylation during single-molecule, real- time sequencing. *Nat*  
726 *Methods* 7(6):461–5.
- 727 26. Fang G, Munera D, Friedman DI, Mandlik A, Chao MC, Banerjee O, et al. 2012.  
728 Genome-wide mapping of methylated adenine residues in pathogenic *Escherichia*  
729 *coli* using single-molecule real-time sequencing. *Nat Biotechnol* 30(12):1232–9.
- 730 27. Eid J. et al. 2009. Real-time DNA sequencing from single polymerase molecules.  
731 *Science* 323:133–138.
- 732 28. Murphy J, Mahony J, Ainsworth S, Nauta A, Sinderen V. 2013. Bacteriophage

- 733 Orphan DNA Methyltransferases : Insights from Their Bacterial Origin , Function ,  
734 and Occurrence. *Appl Environ Microbiol* 79(24):7547–55.
- 735 29. Yadav MK, Park S, Chae S, Song J. 2014. Sinefungin, a Natural Nucleoside  
736 Analogue of S-Adenosylmethionine, Inhibits *Streptococcus pneumoniae* Biofilm  
737 Growth. *Biomed Res Int* 2014:156987.
- 738 30. Du W, Dubarry N, Passot FM, Kamgoué A, Murray H. 2016. Orderly Replication  
739 and Segregation of the Four Replicons of *Burkholderia cenocepacia*. *PLoS Genet*  
740 12(7):1–27.
- 741 31. Roberts RJ, Vincze T, Posfai J, Macelis D. 2005. REBASE — restriction enzymes  
742 and DNA methyltransferases. *Nucleic Acids Res* 33:230–2.
- 743 32. McCammon MT, Parks LW. 1981. Inhibition of Sterol Transmethylation by S-  
744 adenosylhomocysteine analogs. *J Bacteriol* 145(1):106–12.
- 745 33. Aya R, Sarnacki SH, Llana MN, Gabriela A, Guerra L, Giacomodonato MN, et al.  
746 2015. Dam methylation is required for efficient biofilm production in *Salmonella*  
747 *enterica* serovar Enteritidis. *Int J Food Microbiol* 193:15–22.
- 748 34. Ouellette M, Gogarten JP. 2018. Characterizing the DNA Methyltransferases of  
749 *Haloferax volcanii* via Bioinformatics, Gene Deletion, and SMRT Sequencing.  
750 *Genes* 9(3).
- 751 35. Casselli T, Tourand Y, Scheidegger A, Arnold WK, Proulx A, Stevenson B, et al.  
752 2018. DNA methylation by restriction modification systems affects the global  
753 transcriptome profile in *Borrelia burgdorferi*. *J Bacteriol* 200(24):1–17.
- 754 36. Nandi T, Holden MTG, Didelot X, Mehershahi K, Boddey JA, Beacham I, et al.  
755 2015. *Burkholderia pseudomallei* sequencing identifies genomic clades with

- 756 distinct recombination, accessory, and epigenetic profiles. *Genome Res*  
757 25(1):129–41.
- 758 37. Erill I, Puigvert M, Legrand L, Guarischi-Sousa R, Vandecasteele C, Setubal JC,  
759 et al. 2017. Comparative analysis of *Ralstonia solanacearum* methylomes. *Front*  
760 *Plant Sci* 13;8:504.
- 761 38. Suzuki MM, Bird A. 2008. DNA methylation landscapes: provocative insights from  
762 epigenomics. *Nat Rev Genetics* 9(6):465–76.
- 763 39. Tate PH, Bird P. 1993. Effects of DNA methylation on proteins and gene  
764 expression. *Curr Opin Genet Dev.* 3(2):226-31.
- 765 40. Zachary F. Burton. 2018. Evolution Since Coding: Cradles, Halos, Barrels, and  
766 Wings. *General Transcription Factors and Promoters* 27:115–22.
- 767 41. Hickman JW, Tifrea DF, Harwood CS. 2005. A chemosensory system that  
768 regulates biofilm formation through modulation of cyclic diguanylate levels. *Proc*  
769 *Natl Acad Sci USA* 102(40).
- 770 42. Cooper VS, Staples RK, Traverse CC, Ellis CN. 2014. Parallel evolution of small  
771 colony variants in *Burkholderia cenocepacia* biofilms. *Genomics* 104(6, Part  
772 A):447-52.
- 773 43. Traverse CC, Mayo-Smith LM, Poltak SR, Cooper VS. 2013. Tangled bank of  
774 experimentally evolved *Burkholderia* biofilms reflects selection during chronic  
775 infections. *Proceedings of the National Academy of Sciences* 110(3):E250–E9.
- 776 44. Girgis HS, Liu Y, Ryu WS, Tavazoie S. 2007. A Comprehensive Genetic  
777 Characterization of Bacterial Motility. *PLoS Genet* 3(9):1644-60.
- 778 45. Balleza E, López-Bojorquez LN, Martínez-Antonio A, Resendis-Antonio O,

- 779 Lozada-Chávez I, Balderas-Martínez YI, et al. 2009. Regulation by transcription  
780 factors in bacteria: Beyond description. *FEMS Microbiol Rev* 33(1):133–51.
- 781 46. Héberlé É, Bardet AF. 2019. Sensitivity of transcription factors to DNA  
782 methylation. *Essays Biochem* 63(6):727–41.
- 783 47. Lenhart JS, Pillon MC, Guarné A, Biteen JS, Simmons LA. 2016. Mismatch repair  
784 in Gram-positive bacteria. *Res Microbiol* 167(1):4–12.
- 785 48. Roberts, R. J., Vincze, T., Posfai, J., & Macelis, D. 2015. REBASE-a database for  
786 DNA restriction and modification: enzymes, genes and genomes. *Nucleic acids*  
787 *research*. 43(Database issue), D298–D299.
- 788 49. Carver T, Harris SR, Berriman M, Parkhill J, Mcquillan JA. 2012. Artemis : an  
789 integrated platform for visualization and analysis of high-throughput sequence-  
790 based experimental data. *Bioinformatics* 28(4):464–9.
- 791 50. Altschup SF, Gish W, Pennsylvania T, Park U. 1990. Basic Local Alignment  
792 Search Tool. *J Mol Biol* 215(3):403-10.
- 793 51. Hamad MA, Skeldon AM, Valvano MA. 2010. Construction of Aminoglycoside-  
794 Sensitive *Burkholderia cenocepacia* Strains for Use in Studies of Intracellular  
795 Bacteria with the Gentamicin Protection Assay. *Appl Environ Microbiol* 76:3170–  
796 3176
- 797 52. Flannagan RS, Linn T, Valvano MA. 2008. A system for the construction of  
798 targeted unmarked gene deletions in the genus *Burkholderia*. *Environ Microbiol*  
799 10(6):1652–60.
- 800 53. Van Acker H, Ostyn L, Sass A, Daled S, Dhaenens M, Deforce D, et al. 2019. The  
801 role of small proteins in *Burkholderia cenocepacia* J2315 biofilm formation,

- 802 persistence and intracellular growth. *Biofilm*. 2019;1:100001.
- 803 54. Cardona ST, Valvano MA. 2005. An expression vector containing a rhamnose-  
804 inducible promoter provides tightly regulated gene expression in *Burkholderia*  
805 *cenocepacia*. *Plasmid* 54(3):219–28.
- 806 55. Drago L, Agrappi S, Bortolin M, Toscano M, Romanò CL, Vecchi E De. 2016.  
807 How to Study Biofilms after Microbial Colonization of Materials Used in  
808 Orthopaedic Implants. *Int J Mol Sci*.17(3): 293.
- 809 56. Kong EF, Tsui C, Kucharíková S, Andes D. 2016. Commensal Protection of  
810 *Staphylococcus aureus* against Antimicrobials by *Candida albicans* Biofilm Matrix.  
811 7(5):1–12.
- 812 57. Kobayashi K. 2007. *Bacillus subtilis* Pellicle Formation Proceeds through  
813 Genetically Defined Morphological Changes. *J Bacteriol* 189:4920–31.
- 814 58. Sass AM, Van Acker H, Förstner KU, Van Nieuwerburgh F, Deforce D, Vogel J, et  
815 al. 2015. Genome-wide transcription start site profiling in biofilm-grown  
816 *Burkholderia cenocepacia* J2315. *BMC Genomics* 16:775.
- 817 59. Münch R, Hiller K, Grote A, Scheer M, Klein J, Schobert M, Jahn D. 2005. Virtual  
818 Footprint and PRODORIC: An integrative framework for regulon prediction in  
819 prokaryotes. *Bioinformatics* 21(22):4187–9.
- 820
